# Supplementary material
Source: Research Square preprint supplement (doi:10.21203/rs.3.rs-8553244/v1)
Supplement: Supplementary file 1 [file b8538b8b6613e409e8b75908.xlsx]

## Sheet: Sheet1
Medical Record Number	Name	Age	Height	Weight	BMI	BMI classification	Family history	Fertility status before treatment	Number of pregnancies	Pregnancy grading	Number of births	Fertility grading	Menarche time	Stages of menarche	TNM	Stages of T	Clinical Stage	术后病理	lymph node metastasis	Central lymph node metastasis status	Metastasis of lateral cervical lymph nodes
00241492	李小红	27	156	41.5	17.0529	1	0	G1P1	1	2	1	2	14	2	T1bN1bM0	T1b	1	乳头状癌	1	1	1
241508	姜霞	36	168	68	24.093	3	0	G2P1	2	2	1	2	13	2	T2N1bM0	T2	1	乳头状癌	1	1	1
00242155	李莉	23	163	45.3	17.0499	1	0	G0P0	0	1	0	1	14	2	T1aN1bM0	T1a	1	乳头状癌	1	1	1
242606	罗竹宾	50	150	45	20	2	0	G1P1	1	2	1	2	11	1	T1aN0M0	T1a	1	乳头状癌	2	2	2
00242267	李琼华	29	155	63.5	26.4308	3	母亲甲状腺既往行甲状腺肿块手术	G2P2	2	2	2	2	14	2	T2N0M0	T2	1	乳头状癌	2	2	2
241939	樊国群	42	155	69	28.7201	4	0	G1P1	1	2	1	2	13	2	T4bN1bM0	T4b	1	乳头状癌	1	1	1
242493	潘学君	44	158	58	23.2335	2	0	G2P1	2	2	1	2	15	3	T1aN0M0	T1a	1	乳头状癌	2	2	2
242778	张建连*	51	158	54	21.6311	2	0	G3P1	3	3	1	2	13	2	T1aN1bM0	T1a	1	乳头状癌	1	1	1
242942	赵秀英	60	140	43	21.9388	2	0	G2P1	2	2	1	2	17	3	T1bN1aM0	T1b	1	乳头状癌	1	1	2
00242992	杨蕊菥	26	170	98	33.91	4	0	G2P2	2	2	2	2	14	2	T1bN1bM0	T1b	1	乳头状癌	1	1	1
00243152	杨梅	28	152	76	32.8947	4	0	G1P1	1	2	1	2	12	2	T1aN0M0	T1a	1	乳头状癌	2	2	2
243543	杨娟	28	162	47	17.9089	1	0	G0P0	0	1	0	1	14	2	T2N1bM0	T2	1	乳头状癌	1	1	1
243808	韩桠	41	158	59	23.634	2	0	G1P1	1	2	1	2	15	3	T1aN0M0	T1a	1	乳头状癌	2	2	2
243765	刘敏*	58	162	69	26.2917	3	0	G2P2	2	2	2	2	13	2	T1aN0M0	T1a	1	乳头状癌	2	2	2
215208	冯生茹*	54	154	59	24.8777	3	0	G1P1	1	2	1	2	13	2	T1aN0M0	T1a	1	乳头状癌	2	2	2
244777	陈建华	52	168	79	27.9904	3	0	G1P1	1	2	1	2	16	3	T3N1aM0	T3	1	乳头状癌	1	1	2
244287	陈娟	47	154	53	22.3478	2	0	G2P1	2	2	1	2	12	2	T1aN0M0	T1a	1	乳头状癌	2	2	2
244232	张燕琼	42	161	61	23.533	2	0	G6P1	6	4	1	2	14	2	T1aN1bM0	T1a	1	乳头状癌	1	1	1
00243285	郭薇	30	166	54	19.5965	2	0	G1P1	1	2	1	2	13	2	T1aN1aM0	T1a	1	乳头状癌	1	1	2
00244371	钟慧莉	27	150	52	23.1111	2	0	G4P1	4	3	1	2	12	2	T1aN0M0	T1a	1	乳头状癌	2	2	2
244441	唐克芬	44	158	49	19.6283	2	0	G1P1	1	2	1	2	12	2	T1aN0M0	T1a	1	乳头状癌	2	2	2
244572	李玉兰	50	154	56	23.6128	2	0	G1P1	1	2	1	2	15	3	T1bN1bM0	T1b	1	乳头状癌	1	1	1
251051	杨玉英	43	155	50	20.8117	2	0	G1P1	1	2	1	2	13	2	T1bN0M0	T1b	1	乳头状癌	2	2	2
00244827	姚钟情	21	160	52	20.3125	2	0	G0P0	0	1	0	1	16	3	T2N0M0	T2	1	乳头状癌	2	2	2
244875	何得芳*X	64	155	49	20.3954	2	0	G3P2	3	3	2	2	18	3	T1bN1bM0	T1b	2	乳头状癌	1	1	1
243819	张秀华	59	160	57	22.2656	2	0	G2P2	2	2	2	2	17	3	T1aN0M0	T1a	1	乳头状癌	2	2	2
00245026	张冬蓉	30	161	53	20.4467	2	0	G1P1	1	2	1	2	16	3	T1aN1aM0	T1a	1	乳头状癌	1	1	2
243890	刘创	47	155	52	21.6441	2	0	G3P1	3	3	1	2	14	2	T1aN1bM0	T1a	1	乳头状癌	1	1	1
245116	李玉清*	50	157	52	21.0962	2	0	G5P1	5	4	1	2	16	3	T1bN0M0	T1b	1	乳头状癌	2	2	2
245261	文桂芳*X	69	152	55	23.8054	2	0	G5P3	5	4	3	3	15	3	T4bN1bM0	T4b	4	乳头状癌	1	1	1
245286	张萍	42	157	43	17.4449	1	0	G1P1	1	2	1	2	14	2	T2N0M0	T2	1	乳头状癌	2	2	2
245278	刘玉华	39	156	48	19.7239	2	0	G1P1	1	2	1	2	13	2	T2N1bM0	T2	1	乳头状癌	1	1	1
00245402	颉睿	24	158	44	17.6254	1	0	G0P0	0	1	0	1	15	3	T3N1aM0	T3	1	乳头状癌	1	1	2
245703	央曦	42	155	59	24.5578	3	0	G0P0	0	1	0	1	12	2	T1bN1aM0	T1b	1	乳头状癌	1	1	2
00245442	张万英	25	158	69	27.6398	3	母亲、外婆患有甲状腺肿大，具体不详	G2P2	2	2	2	2	15	3	T1bN1bM0	T1b	1	乳头状癌	1	1	1
245851	何均琼	71	150	65	28.8889	4	0	G5P3	5	4	3	3	13	2	T1aN0M0	T1a	1	乳头状癌	2	2	2
245887	林玲	63	152	51	22.0741	2	0	G2P2	2	2	2	2	13	2	T1aN1aM0	T1a	2	乳头状癌	1	1	2
245878	陈红	44	162	54	20.5761	2	0	G1P1	1	2	1	2	15	3	T2N1aM0	T2	1	乳头状癌	1	1	2
00245897	吴莉莎	23	162	52	19.8141	2	0	G0P0	0	1	0	1	14	2	T1bN1aM0	T1b	1	乳头状癌	1	1	2
246087	蹇守卿	60	156	54	22.1893	2	父亲、姐姐、哥哥均有高血压病史	G1P1	1	2	1	2	14	2	T1aN0M0	T1a	1	乳头状癌	2	2	2
00246090	罗旭	30	159	46	18.1955	1	0	G2P1	2	2	1	2	11	1	T1aN1bM0	T1a	1	乳头状癌	1	1	1
245403	邓光凤*X	50	152	65	28.1337	4	0	G10P1	10	4	1	2	16	3	T1aN1bM0	T1a	1	乳头状癌	1	1	1
00245497	罗云芳	26	163	57	21.4536	2	0	G0P0	0	1	0	1	12	2	T1bN1bM0	T1b	1	乳头状癌	1	1	1
00246095	贺静娴	30	155	45	18.7305	2	0	G0P0	0	1	0	1	12	2	T1aN0M0	T1a	1	乳头状癌	2	2	2
246257	张娟娟	35	159	52	20.5688	2	0	G2P1	2	2	1	2	13	2	T3N1aM0	T3	1	乳头状癌	1	1	2
245490	罗述碧	73	155	66	27.4714	3	0	G6P6	6	4	6	4	18	3	T4N1bM0	T4	4	乳头状癌	1	1	1
246301	刘冰*	68	157	77	31.2386	4	母亲患有肝癌	G4P2	4	3	2	2	17	3	T1aN0M0	T1a	1	乳头状癌	2	2	2
246139	何清斌	49	158	59	23.634	2	0	G2P2	2	2	2	2	14	2	T4N1bM0	T4	1	FTC	1	1	1
198270	刘娟	51	155	53	22.0604	2	0	G3P1	3	3	1	2	12	2	T1aN1bM0	T1a	1	乳头状癌	1	1	1
00246571	梁婷婷	30	160	64	25	3	0	G4P2	4	3	2	2	12	2	T4aN1bM0	T4a	1	乳头状癌	1	1	1
00246676	郭洁	29	165	57	20.9366	2	0	G0P0	0	1	0	1	14	2	T1aN1aM0	T1a	1	乳头状癌	1	1	2
246709	刘俊	31	160	39	15.2344	1	0	G1P1	1	2	1	2	13	2	T4N1bM0	T4b	1	乳头状癌	1	1	1
0024685	肖红	23	166	60	21.7738	2	0	G1P1	1	2	1	2	13	2	T1aN1aM0	T1a	1	乳头状癌	1	1	2
246963	刘晓玫	57	153	45	19.2234	2	家族高血压病史	G1P1	1	2	1	2	15	3	T3N1bM0	T3	2	乳头状癌	1	1	1
246885	曾桂芳*	79	148	60	27.3923	3	0	G2P2	2	2	2	2	17	3	T4N1bM0	T4b	4	乳头状癌	1	1	1
247205	李仁凤*	32	157	54	21.9076	2	0	G1P1	1	2	1	2	14	2	T1bN1bM0	T1b	1	乳头状癌	1	1	1
00247190	聂毅	28	162	52	19.8141	2	0	G2P1	2	2	1	2	11	1	T2N1aM0	T2	1	乳头状癌	1	1	2
247311	廖小英	53	158	51	20.4294	2	0	G2P2	2	2	2	2	17	3	T1bN1bM0&#10;	T1b	1	乳头状癌	2	1	1
247235	叶绍春*	46	160	63	24.6094	3	父亲肠癌、母亲肝硬化	G3P1	3	3	1	2	14	2	T1bN1aM1	T1b	1	乳头状癌	1	1	2
247345	冯萍*	59	158	55	22.0317	2	0	G1P1	1	2	1	2	15	3	T1bN0M0	T1b	1	乳头状癌	2	2	2
247406	王华琼	50	150	58	25.7778	3	0	G6P1	6	4	1	2	16	3	T1aN0M0	T1a	1	乳头状癌	2	2	2
00247387	余光琴	28	150	58	25.7778	3	0	G1P1	1	2	1	2	14	2	T1aN1aM0	T1a	1	乳头状癌	1	1	2
247490	范祖琴*	36	148	53	24.1965	3	0	G2P1	2	2	1	2	15	3	T1aN0M0	T1a	1	乳头状癌	2	2	2
248477	何传渝*	58	155	49	20.3954	2	0	G1P1	1	2	1	2	12	2	T1aN0M0	T1a	1	乳头状癌	2	2	2
247580	周蓉*	54	163	70	26.3465	3	0	G3P1	3	3	1	2	17	3	T1aN1bM0	T1a	1	乳头状癌	1	1	1
00247587	杨琴	25	148	44	20.0877	2	0	G0P0	0	1	0	1	13	2	T1bN1aM0	T1b	1	乳头状癌	1	1	2
247643	魏华	41	154	51	21.5045	2	0	G0P0	0	1	0	1	13	2	T1aN1aM0	T1a	1	乳头状癌	1	1	2
247780	陈艳@	34	158	53	21.2306	2	0	G0P0	0	1	0	1	16	3	T1aN0M0	T1a	1	乳头状癌	2	2	2
248038	芮银华*	40	148	48	21.9138	2	0	G3P1	3	3	1	2	15	3	T2N1bM0	T2	1	乳头状癌	1	1	1
246729	方洁*	53	168	69	24.4473	3	0	G2P1	2	2	1	2	15	3	T1aN0M0	T1a	1	乳头状癌	2	2	2
247357	龙仕连	57	152	51	22.0741	2	0	G3P2	3	3	2	2	12	2	T1aN0M0	T1a	1	乳头状癌	2	2	2
248157	王敬珍*	73	165	66	24.2424	3	0	G3P2	3	3	2	2	16	3	T1bN0M0	T1b	1	乳头状癌	2	2	2
00248093	叶倩云	24	160	58	22.656	2	0	G0P0	0	1	0	1	11	1	T1bN0M0	T1b	1	乳头状癌	2	2	2
248270	张怡*	49	164	59	21.9363	2	0	G1P1	1	2	1	2	14	2	T1aN0M0	T1a	1	乳头状癌	2	2	2
248365	杨俊*X	40	156	40	16.4366	1	0	G1P1	1	2	1	2	15	3	T1aN0M0	T1a	1	乳头状癌	2	2	2
248339	黄玉辉	64	150	60	26.6667	3	0	G4P4	4	3	4	3	16	3	T4N1bM0	T4	4	乳头状癌	1	1	1
00248406	刘冠伶	26	160	70	27.3438	3	0	G1P1	1	2	1	2	12	2	T1bN1bM0	T1b	1	乳头状癌	1	1	1
00248384	李阳	24	163	60	22.5827	2	0	G0P0	0	1	0	1	13	2	T1aN0M0	T1a	1	乳头状癌	2	2	2
248535	李贤玉	40	156	56	23.0112	2	0	G1P1	1	2	1	2	15	3	T1aN0M0	T1a	1	乳头状癌	2	2	2
00248692	杨丽萍	27	155	45	18.7305	2	0	G0P0	0	1	0	1	13	2	T1aN1aM0	T1a	1	乳头状癌	1	1	2
249106	胡兰芝	49	165	62	22.7732	2	0	G3P1	3	3	1	2	12	2	T1aN1aM0	T1a	1	乳头状癌	1	1	2
00249102	罗燕梅	28	170	69	23.8754	2	0	G1P1	1	2	1	2	14	2	T1aN1bM0	T1a	1	乳头状癌	1	1	1
00248896	张小红	28	154	57	24.0344	3	0	G0P0	0	1	0	1	13	2	T1bN1bM0	T1b	1	乳头状癌	1	1	1
00249233	李钰莹	22	162	45	17.1468	1	0	G0P0	0	1	0	1	11	1	T1aN1aM0	T1a	1	乳头状癌	1	1	2
248057	兰英*X	46	153	57	24.3496	3	0	G4P2	4	3	2	2	14	2	T1bN0M0	T1b	1	乳头状癌	2	2	2
249123	周成美	46	155	52	21.6441	2	0	G2P1	2	2	1	2	12	2	T1bN1aM0	T1b	1	乳头状癌	1	1	2
00249231	陈序	24	158	38	15.2219	1	0	G2P2	2	2	2	2	12	2	T2N1bM0	T2	1	乳头状癌	1	1	1
249347	梁琼	52	159	46	18.1955	1	0	G2P2	2	2	2	2	17	3	T2N1bM0	T2	1	乳头状癌	1	1	1
249400	胡静*X	45	160	49	19.1406	2	0	G3P1	3	3	1	2	13	2	T1bN1aM0	T1b	1	乳头状癌	1	1	2
249552	张淑艳*	38	174	67	22.1297	2	0	G1P1	1	2	1	2	13	2	T1aN1aM0	T1a	1	乳头状癌	1	1	2
250096	汪玉华*X	50	155	49	20.3954	2	0	G4P1	4	3	1	2	15	3	T1bN0M0	T1b	1	乳头状癌	2	2	2
249553	陈明琴	49	149	51	22.9719	2	0	G4P2	4	3	2	2	15	3	T1bN1bM0	T1b	1	乳头状癌	1	1	1
248094	张会兰	64	163	75	28.2284	4	0	G3P3	3	3	3	3	14	2	T1bN0M0	T1b	1	乳头状癌	2	2	2
00248116	陈文彩	28	157	50	20.2848	2	0	G0P0	0	1	0	1	12	2	T3N1bM0	T3	1	乳头状癌	1	1	1
00249710	罗丽	29	160	55	21.4844	2	0	G5P1	5	4	1	2	14	2	T2N1aM0	T2	1	乳头状癌	1	1	2
249741	文淑君	49	155	51	21.2279	2	0	G2P2	2	2	2	2	11	1	T1aN0M0	T1a	1	乳头状癌	2	2	2
249689	王香珍	51	148	60	27.3923	3	0	G2P2	2	2	2	2	16	3	T4N1bM0	T4b	1	乳头状癌	1	1	1
249814	胡巧玲	50	160	40	15.625	1	0	G3P1	3	3	1	2	13	2	T1aN0M0	T1a	1	乳头状癌	2	2	2
249504	蒲红*	46	164	60	22.3081	2	0	G3P1	3	3	1	2	12	2	T1aN1aM0	T1a	1	乳头状癌	1	1	2
249832	赵淑琴	42	158	57	22.8329	2	0	G1P1	1	2	1	2	13	2	T1bN1aM0	T1b	1	乳头状癌	1	1	2
245739	张娟@	48	160	60	23.4375	2	0	G3P0	3	3	0	1	15	3	T1aN1aM0	T1a	1	乳头状癌	1	1	2
00250040	程烈	28	162	57	21.7193	2	0	G1P1	1	2	1	2	15	3	T3N1aM0	T3	1	乳头状癌	1	1	2
00250178	张玉梅	19	147	41	18.9736	2	0	G0P0	0	1	0	1	14	2	T4bN1bM0	T4b	4	乳头状癌	1	1	1
00250326	宋茗	56	157	45	18.2563	1	0	G3P2	3	3	2	2	11	1	T4aN1bM0	T4a	1	乳头状癌	1	1	1
245126	赵晓*	38	156	55	22.6003	2	0	G2P0	2	2	0	1	9	1	T1aN0M0	T1a	1	乳头状癌	2	2	2
250472	田贞仙	60	168	54	19.1327	2	0	G2P1	2	2	1	2	16	3	T1aN0M0	T1a	1	乳头状癌	2	2	2
250578	林岚	49	156	53	21.7784	2	0	G1P1	1	2	1	2	13	2	T1bN0M0	T1b	1	乳头状癌	2	2	2
250619	王翠华	40	148	57	26.0226	3	0	G3P1	3	3	1	2	14	2	T2N0M0	T2	1	乳头状癌	2	2	2
250590	杨金莲	50	153	56	23.9224	2	0	G3P2	3	3	2	2	18	3	T1bN1aM0	T1b	1	乳头状癌	1	1	2
250753	周阳艳	41	162	49	18.6709	2	0	G1P1	1	2	1	2	16	3	T1aN0M0	T1a	1	乳头状癌	2	2	2
250000	周雪英*	48	160	53	20.7031	2	0	G4P1	4	3	1	2	14	2	T1aN0M0	T1a	1	乳头状癌	2	2	2
251001	向树军	65	143	46	22.495	2	0	G2P2	2	2	2	2	14	2	T1aN1bM0	T1a	2	乳头状癌	1	1	1
250761	赵利	58	156	47	19.313	2	其姐姐既往行甲状腺乳头状癌手术	G3P1	3	3	1	2	12	2	T4aN1bM0	T4a	3	乳头状癌	1	1	1
249688	杨翠萍	52	155	60	24.974	3	0	G5P2	5	4	2	2	15	3	T3N1aM0	T3	1	乳头状癌	1	1	2
250787	曾珍	33	160	48	18.75	2	0	G1P1	1	2	1	2	13	2	T1bN1aM0	T1b	1	乳头状癌	1	1	2
250871	刘贤蓉	38	159	46	18.1955	1	祖母患膀胱癌	G6P1	6	4	1	2	14	2	T1aN0M0	T1a	1	乳头状癌	2	2	2
251029	姚华萍	35	153	54	23.0681	2	外公患食管癌	G2P2	2	2	2	2	14	2	T1aN1aM0	T1a	1	乳头状癌	1	1	2
250237	李安群	68	150	53	23.5556	2	0	G5P5	5	4	5	4	18	3	T3N1bM0	T3	2	乳头状癌	1	1	1
251269	李世芳	50	150	58	25.7778	3	0	G3P2	3	3	2	2	16	3	T1bN0M0	T1b	1	乳头状癌	2	2	2
251461	蒋光棋	77	162	65	24.7676	3	0	G3P2	3	3	2	2	14	2	T1aN0M0	T1a	1	乳头状癌	2	2	2
251468	李玉芬*	62	162	70	26.6728	3	0	G4P2	4	3	2	2	14	2	T4bN1bM0	T4b	4	乳头状癌	1	1	1
244696	杨龙芬	43	162	60	22.8624	2	0	G3P1	3	3	1	2	14	2	T2N0M0	T2	1	乳头状癌	2	2	2
251528	张庚会	46	150	46	20.4444	2	0	G1P1	1	2	1	2	14	2	T1bN1bM0	T1b	1	乳头状癌	1	1	1
251623	胡蓉*	50	162	59	22.4813	2	0	G1P1	1	2	1	2	15	3	T1bN0M0	T1b	1	乳头状癌	2	2	2
251659	陈月英	41	158	46	18.4265	1	0	G5P2	5	4	2	2	12	2	T1aN0M0	T1a	1	乳头状癌	2	2	2
251069	魏八仙	60	159	65	25.711	3	0	G5P2	5	4	2	2	11	1	T4aN0M0	T4a	3	乳头状癌	2	2	2
251721	苏绍群*X	60	149	49	22.0711	2	0	G2P2	2	2	2	2	12	2	T1aN0M0	T1a	1	乳头状癌	2	2	2
251753	申淑明	51	150	47	20.8889	2	0	G1P1	1	2	1	2	16	3	T1aN1bM0	T1a	1	乳头状癌	1	1	1
251682	唐淑群	66	155	56	23.3091	2	0	G9P4	9	4	4	3	14	2	T3N1bM0	T3	2	乳头状癌	1	1	1
00251931	苏娟	29	160	59	23.0469	2	0	G1P1	1	2	1	2	14	2	T1bN1bM0	T1b	1	乳头状癌	1	1	1
249432	刘杰*X	45	150	42	18.6667	2	0	G3P1	3	3	1	2	13	2	T1aN0M0	T1a	1	乳头状癌	2	2	2
252022	王佳巧*	33	160	54	21.0938	2	0	G1P1	1	2	1	2	13	2	T1bN0M0	T1b	1	乳头状癌	2	2	2
252121	彭会琼	40	160	46	17.9688	1	0	G3P1	3	3	1	2	16	3	T1aN0M0	T1a	1	乳头状癌	2	2	2
252114	唐忠蓉	45	156	58	23.833	2	0	G3P1	3	3	1	2	13	2	T1aN1aM0	T1a	1	乳头状癌	1	1	2
252124	徐冰*	58	160	59	23.0469	2	0	G3P1	3	3	1	2	14	2	T1bN0M0	T1b	1	乳头状癌	2	2	2
252146	葛玉香	62	155	53	22.0604	2	父亲患有肝癌，母亲患有心脏病	G3P3	3	3	3	3	18	3	T1aN0M0	T1a	1	乳头状癌	2	2	2
00252263	王小青	25	160	58	22.6562	2	0	G3P2	3	3	2	2	15	3	TxN1aM0	T1a	1	乳头状癌	1	1	2
252221	张小英*X	43	150	43	19.1111	2	0	G3P1	3	3	1	2	12	2	T1aN1aM0	T1a	1	乳头状癌	1	1	2
251883	蒋迎春	63	153	72	30.7574	4	0	G5P4	5	4	4	3	10	1	T4bN1bM0	T4b	4	乳头状癌	1	1	1
251283	王淑英	50	155	71	29.5525	4	0	G1P1	1	2	1	2	16	3	T1bN1aM0	T1b	1	乳头状癌	1	1	2
195219	白央	44	167	99	35.4979	4	0	G0P0	0	1	0	1	13	2	T1aN1bM0	T1a	1	乳头状癌	1	1	1
00252436	周艳君	24	155	54	22.4766	2	家族高血压糖尿病史	G0P0	0	1	0	1	12	2	T1aN0M0	T1a	1	乳头状癌	2	2	2
252492	樊翠芳	60	155	53	22.0604	2	0	G3P3	3	3	3	3	13	2	T4aN1aM0	T4a	3	乳头状癌	1	1	2
252630	陈佳丽	24	158	45	18.026	1	0	G0P0	0	1	0	1	12	2	T1aN1aM0	T1a	1	乳头状癌	1	1	2
252474	苏天蓉*	47	170	67	23.1834	2	0	G1P1	1	2	1	2	14	2	T1N0M0	T1	1	乳头状癌	2	2	2
00252694	余阳	28	162	59	22.4813	2	0	G0P0	0	1	0	1	14	2	T1aN1bM0	T1a	1	乳头状癌	1	1	1
00252887	唐妮	29	155	60	24.974	3	0	G1P1	1	2	1	2	13	2	T1bN1aM0	T1b	1	乳头状癌	1	1	2
00252912	刘露蔓	25	159	50	19.7777	2	0	G0P0	0	1	0	1	12	2	T1bN1aM0	T1b	1	乳头状癌	1	1	2
252909	陈韬	33	171	78	26.6749	3	0	G0P0	0	1	0	1	14	2	T1bN1bM0	T1b	1	乳头状癌	1	1	1
252656	凡明芳	51	150	54	24	3	0	G1P1	1	2	1	2	17	3	T1aN0M0	T1a	1	乳头状癌	2	2	2
252770	代煜祺*	34	163	66	24.841	3	0	G1P1	1	2	1	2	15	3	T1aN0M0	T1a	1	乳头状癌	2	2	2
252766	凌静华*X	50	158	62	24.8358	3	0	G2P1	2	2	1	2	14	2	T1aN0M0	T1a	1	乳头状癌	2	2	2
252796	桂妮	36	160	48	18.75	2	0	G1P1	1	2	1	2	14	2	T1aN0M0	T1a	1	乳头状癌	2	2	2
252800	汪治群*	48	158	50	20.0288	2	0	G1P1	1	2	1	2	14	2	T1aN0M0	T1a	1	乳头状癌	2	2	2
253189	薛梅*	42	153	44	18.7962	2	0	G2P2	2	2	2	2	18	3	T1aN1aM0	T1a	1	乳头状癌	1	1	2
00253055	王凤	29	150	54	24	3	0	G1P1	1	2	1	2	12	2	T1aN1bM0	T1a	1	乳头状癌	1	1	1
253042	廖正琼	51	158	66	26.4381	3	0	G4P2	4	3	2	2	13	2	T1bN0M0	T1b	1	乳头状癌	2	2	2
253074	朱小燕	31	158	53	21.2306	2	0	G1P1	1	2	1	2	13	2	T1bN1bM0	T1b	1	乳头状癌	1	1	1
253253	郭建华*	58	158	53	21.2306	2	0	G1P1	1	2	1	2	11	1	T1aN0M0	T1a	1	乳头状癌	2	2	2
253231	杨廷秀	63	154	65	27.4077	3	0	G3P3	3	3	3	3	14	2	T3N1aM0	T3	2	乳头状癌	1	1	2
253249	唐仕俊	69	157	42	17.0392	1	0	G3P3	3	3	3	3	14	2	T4bN1bM0	T4b	4	乳头状癌	1	1	1
296289	赫清秀	51	168	61	21.6128	2	0	G4P1	4	3	1	2	15	3	T1aN1aM0	T1a	1	乳头状癌	1	1	2
253145	冯艳*	34	160	85	33.2031	4	0	G2P1	2	2	1	2	13	2	T1aN0M0	T1a	1	乳头状癌	2	2	2
253200	林雪飞*	44	150	54	24	3	0	G1P1	1	2	1	2	12	2	T1aN1aM0	T1a	1	乳头状癌	1	1	2
252333	罗英	41	160	70	27.3438	3	0	G3P1	3	3	1	2	16	3	T1aN1bM0	T1a	1	乳头状癌	1	1	1
253410	李建容	41	155	60	24.974	3	0	G7P5	7	4	5	4	14	2	T1aN1aM0	T1a	1	乳头状癌	1	1	2
253363	陈俊华	45	172	65	21.9713	2	0	G1P1	1	2	1	2	15	3	T2N1bM0	T2	1	乳头状癌	1	1	1
253626	辜玉琼*	51	152	75	32.4619	4	0	G3P1	3	3	1	2	16	3	T1aN1aM0	T1a	1	乳头状癌	1	1	2
253628	鲜碧琼	41	160	61	23.8281	2	0	G2P2	2	2	2	2	14	2	T1bN0M0	T1b	1	乳头状癌	2	2	2
253685	尹红	42	167	73	26.1752	3	0	G0P0	0	1	0	1	14	2	T2N1bM0	T2	1	乳头状癌	1	1	1
253782	李敏	42	168	61	21.6128	2	0	G3P3	3	3	3	3	14	2	T4aN1aM0	T4a	1	乳头状癌	1	1	2
253382	奉光群*	65	159	59	23.3377	2	0	G4P2	4	3	2	2	15	3	T1aN1aM0	T1a	2	乳头状癌	1	1	2
253942	向春芳	40	165	56	20.5693	2	0	G1P1	1	2	1	2	14	2	T1bN0M0	T1b	1	乳头状癌	2	2	2
00253965	向发明	27	158	55	22.032	2	0	G1P1	1	2	1	2	16	3	T4aN1bM0	T4a	1	乳头状癌	1	1	1
253992	强晓燕	41	158	66	26.4381	3	0	G1P1	1	2	1	2	14	2	T1aN0M0	T1a	1	乳头状癌	2	2	2
253839	肖翠声	48	155	60	24.974	3	0	G3P1	3	3	1	2	15	3	T1aN1aM0	T1a	1	乳头状癌	1	1	2
234259	李开伟*X	46	151	55	24.1217	3	0	G1P1	1	2	1	2	14	2	T1bN0M0	T1b	1	乳头状癌	2	2	2
254095	杨治华	34	162	67	25.5296	3	0	G1P1	1	2	1	2	16	3	T1bN1bM0	T1b	1	乳头状癌	1	1	1
00254104	张雪	27	154	47	19.8178	2	0	G0P0	0	1	0	1	12	2	T3N1bM0	T3	1	乳头状癌	1	1	1
00254071	钟锦	28	160	68	26.5625	3	0	G0P0	0	1	0	1	12	2	T1aN0M1	T1a	2	乳头状癌	2	2	2
254325	颜莉君*	36	162	57	21.7193	2	0	G1P0	1	2	0	1	12	2	T2N1bM0	T2	1	乳头状癌	1	1	1
254316	杨瑞红	43	158	52	20.83	2	0	G1P1	1	2	1	2	14	2	T1aN1aM0	T1a	1	乳头状癌	1	1	2
254395	唐玲	41	156	81	33.284	4	0	G1P1	1	2	1	2	13	2	T1bN0M0	T1b	1	乳头状癌	2	2	2
254511	李庆燕	37	165	70	25.7117	3	0	G1P1	1	2	1	2	14	2	T1aN0M0	T1a	1	乳头状癌	2	2	2
254472	马茂芹*	51	157	60	24.3418	3	0	G1P1	1	2	1	2	17	3	T1aN1aM0	T1a	1	乳头状癌	1	1	2
254575	方玉书	42	168	59	20.9042	2	0	G1P1	1	2	1	2	14	2	T1aN0M0	T1a	1	乳头状癌	2	2	2
00254668	罗琼	30	158	65	26.0375	3	0	G2P1	2	2	1	2	14	2	T1bN1aM0	T1b	1	乳头状癌	1	1	2
254650	王海燕	39	155	83	34.5473	4	0	G2P2	2	2	2	2	15	3	T1bN0M0	T1b	1	乳头状癌	2	2	2
254274	陈梁春*	38	155	49	20.3954	2	0	G1P1	1	2	1	2	13	2	T2N0M0	T2	1	乳头状癌	2	2	2
00001129	邓睿淇	25	163	57	21.4536	2	0	G0P0	0	1	0	1	12	2	T1bN0M0	T1b	1	乳头状癌	2	2	2
254848	杨艳	57	156	56	23.0112	2	0	G1P1	1	2	1	2	14	2	T2N1bM0	T2	2	乳头状癌	1	1	1
254981	邱运冰	58	158	57	22.8329	2	0	G1P1	1	2	1	2	15	3	T1bN1aM0	T1b	2	乳头状癌	1	1	2
255099	叶毓芸	76	164	64	23.7954	2	母亲高血压病史	G2P2	2	2	2	2	14	2	T1aN0M0	T1a	1	乳头状癌	2	2	2
00255215	吴梦玉	28	168	59	20.9042	2	0	G0P0	0	1	0	1	14	2	T1aN0M0	T1a	1	乳头状癌	2	2	2
255220	张俊	57	157	55	22.3133	2	0	G1P1	1	2	1	2	14	2	T1aN1aM0	T1a	2	乳头状癌	1	1	2
00255275	何成承	26	168	60	21.2585	2	0	G0P0	0	1	0	1	13	2	T1aN1aM0	T1a	1	乳头状癌	1	1	2
255260	卢华莉	62	155	52	21.6441	2	0	G4P3	4	3	3	3	13	2	T4bN1bM0	T4b	4	乳头状癌	1	1	1
255242	曹晓林	39	152	46	19.91	2	0	G1P1	1	2	1	2	14	2	T1bN0M0	T1b	1	乳头状癌	2	2	2
00255352	周玉霞	28	152	49	21.2084	2	母亲甲状腺功能减退	G1P1	1	2	1	2	12	2	T1aN1bM0	T1a	1	乳头状癌	1	1	1
255394	欧莉	32	163	53	19.9481	2	0	G1P1	1	2	1	2	12	2	T2N1 b M0	T21	1	乳头状癌	1	1	1
255471	刘林林*	35	172	63	21.2953	2	0	G1P1	1	2	1	2	13	2	T1aN0M0	T1a	1	乳头状癌	2	2	2
255501	杜艳琼	49	160	63	24.6094	3	0	G2P2	2	2	2	2	16	3	T1aN1aM0	T1a	1	乳头状癌	1	1	2
255531	肖琴*	31	152	48	20.7756	2	0	G0P0	0	1	0	1	12	2	T1aN0M0	T1a	1	乳头状癌	2	2	2
255616	邱明霞	33	160	48	18.75	2	0	G0P0	0	1	0	1	14	2	T1aN1aM0	T1a	1	乳头状癌	1	1	2
00255171	胡静	29	163	55	20.7008	2	0	G0P0	0	1	0	1	12	2	T1aN0M0	T1a	1	乳头状癌	2	2	2
00255693	董事儿	29	160	60	23.4375	2	0	G0P0	0	1	0	1	14	2	T1bN1bM0	T1b	1	乳头状癌	1	1	1
00255160	柯亚菲	23	164	48	17.8465	1	0	G0P0	0	1	0	1	12	2	T1bN1bM0	T1b	1	乳头状癌	1	1	1
255143	刘志英	53	163	55	20.7008	2	0	G2P1	2	2	1	2	17	3	T2N0M0	T2	1	乳头状癌	2	2	2
00255685	孔潇潇	22	156	44	18.0802	1	0	G0P0	0	1	0	1	14	2	T2N1bM0	T2	1	乳头状癌	1	1	1
255714	敖相秀	31	155	50	20.8117	2	0	G1P1	1	2	1	2	15	3	T1aN1aM0	T1a	1	乳头状癌	1	1	2
255729	朱小芬	56	160	52	20.3125	2	0	G5P1	5	4	1	2	10	2	T1bN1bM0	T1b	2	乳头状癌	1	1	1
255817	蔡顺莲	43	155	56	23.3091	2	0	G5P3	5	4	3	3	14	2	T1aN0M0	T1a	1	乳头状癌	2	2	2
255807	钟莉	47	163	66	24.841	3	0	G1P1	1	2	1	2	13	2	T1aN0M0	T1a	1	乳头状癌	2	2	2
255855	孙洁	35	165	63	23.1405	2	0	G3P1	3	3	1	2	12	2	T1aN1aM0	T1a	1	乳头状癌	1	1	2
255772	龚春梅	47	165	60	22.0386	2	0	G5P2	5	4	2	2	12	2	T2N0M0	T2	1	乳头状癌	2	2	2
255851	周志桃	66	160	60	23.4375	2	0	G1P1	1	2	1	2	14	2	T1bN0M0	T1b	1	乳头状癌	2	2	2
255936	刘俊华*	69	155	44	18.3143	1	0	G5P3	5	4	3	3	15	3	T1aN1aM0	T1a	2	乳头状癌	1	1	2
255183	陈淑芳	63	155	67	27.8876	3	0	G2P2	2	2	2	2	14	2	T1aN1aM0	T1a	2	乳头状癌	1	1	2
256065	徐虹秋	46	159	56	22.151	2	0	G1P1	1	2	1	2	14	2	T1bN1aM0	T1b	1	乳头状癌	1	1	2
256078	王莉	38	165	81	29.7521	4	0	G1P1	1	2	1	2	14	2	T1bN1bM0	T1b	1	乳头状癌	1	1	1
248761	吴素容@YZ	51	165	53	19.4674	2	0	G6P1	6	4	1	2	14	2	T1aN0M0	T1a	1	乳头状癌	2	2	2
256240	米艳	38	160	50	19.5312	2	0	G5P2	5	4	2	2	12	2	T1aN0M0	T1a	1	乳头状癌	2	2	2
254846	王渊	43	158	63	25.2363	3	0	G1P1	1	2	1	2	14	2	T1aN1bM0	T1a	1	乳头状癌	1	1	1
00256246	梁文菊	20	162	55	20.9572	2	0	G0P0	0	1	0	1	15	3	T1bN1aM0	T1b	1	乳头状癌	1	1	2
00256101	李佳欣	29	160	63	24.6094	3	0	G1P1	1	2	1	2	12	2	T1aN0M0	T1a	1	乳头状癌	2	2	2
255653	赖金蓉*	50	155	64	26.6389	3	0	G1P1	1	2	1	2	12	2	T3N0M0	T3	1	乳头状癌	2	2	2
256407	曾开华*	53	160	52	20.3125	2	0	G3P1	3	3	1	2	12	2	T3N1aM0	T3	1	乳头状癌	1	1	2
256802	蒋坤珍	48	151	56	24.5603	3	0	G2P2	2	2	2	2	14	2	T1bN0M0	T1b	1	乳头状癌	2	2	2
246877	王成芳	40	159	66	26.1066	3	父亲高血压，死于脑溢血	G3P2	3	3	2	2	13	2	T1aN0M0	T1a	1	乳头状癌	2	2	2
256604	沈晓薇	33	160	58	22.6562	2	父亲高血压，奶奶糖尿病	G1P1	1	2	1	2	12	2	T1aN0M0	T1a	1	乳头状癌	2	2	2
256549	孙凤贤	62	160	71	27.7344	3	0	G3P2	3	3	2	2	14	2	T1aN0M0	T1a	1	乳头状癌	2	2	2
256592	谢友华*X	59	160	70	27.3438	3	0	G2P1	2	2	1	2	17	3	T2N0M0	T2	1	乳头状癌	2	2	2
256271	尹林玉	33	158	50	20.0288	2	父亲脑肿瘤死于	G1P1	1	2	1	2	12	2	T2N1bM0	T2	1	乳头状癌	1	1	1
256720	王新幸*	61	163	68	25.5937	3	女儿甲状腺癌	G11P1	11	4	1	2	14	2	T1aN0M0	T1a	1	乳头状癌	2	2	2
00245039	贾水香	29	152	54	23.3726	2	0	G2P2	2	2	2	2	16	3	T2N0M0	T2	1	乳头状癌	2	2	2
256853	王剑英	43	158	75	30.0433	4	0	G1P1	1	2	1	2	14	2	T1aN0M0	T1a	1	乳头状癌	2	2	2
00256838	辛勤	27	161	60	23.1473	2	0	G0P0	0	1	0	1	12	2	T2N1bM0	T2	1	乳头状癌	1	1	1
256165	蒲蓉*	50	156	59	24.2439	3	0	G1P1	1	2	1	2	18	3	T1aN0M0	T1a	1	乳头状癌	2	2	2
256180	李厚芳*	68	162	63	24.0055	3	0	G1P1	1	2	1	2	16	3	T1aN0M0	T1a	1	乳头状癌	2	2	2
256901	赵春艳	44	158	66	26.4381	3	0	G1P1	1	2	1	2	17	3	T1aN1aM0	T1a	1	乳头状癌	1	1	2
256890	邓侨钰	35	163	59	22.2063	2	0	G5P1	5	4	1	2	12	2	T4N1bM0	T4	1	乳头状癌	1	1	1
257526	刘秀兰	41	160	56	21.875	2	0	G2P2	2	2	2	2	18	3	T1bN1aM0	T1b	1	乳头状癌	1	1	2
00257148	张慧	26	164	59	21.9363	2	0	G1P1	1	2	1	2	15	3	T2N1bM0	T2	1	乳头状癌	1	1	1
257242	彭桂珍*	66	140	65	33.1633	4	0	G4P2	4	3	2	2	10	1	T4bN1aM0	T4b	4	乳头状癌	1	1	2
257298	贾秋兰	58	160	58	22.6562	2	0	G3P2	3	3	2	2	15	3	T1aN0M0	T1a	1	乳头状癌	2	2	2
257404	宋启育	40	149	39	17.5668	1	0	G1P1	1	2	1	2	14	2	T1bN0M0	T1b	1	乳头状癌	2	2	2
00257429	范娟	21	161	47	18.132	1	0	G0P0	0	1	0	1	15	3	T2N1bM0	T2	1	乳头状癌	1	1	1
257063	龚红梅	40	150	56	24.8889	3	0	G2P2	2	2	2	2	12	2	T1aN1bM0	T1a	1	乳头状癌	1	1	1
257587	吕红因（右	41	161	75	28.9341	4	0	G2P2	2	2	2	2	15	3	T1aN0M0	T1a	1	乳头状癌	2	2	2
257708	谢林霞	41	155	58	24.1415	3	0	G2P1	2	2	1	2	17	3	T1aN1aM0	T1a	1	乳头状癌	1	1	2
251847	陈兰英	44	155	52	21.6441	2	0	G3P1	3	3	1	2	14	2	T1bN1bM0	T1b	1	乳头状癌	1	1	1
257698	吴章华	48	158	58	23.2335	2	0	G1P1	1	2	1	2	14	2	T1aN0M0	T1a	1	乳头状癌	2	2	2
257694	陈祥兰	50	162	61	23.2434	2	0	G1P1	1	2	1	2	14	2	T1aN1aM0	T1a	1	乳头状癌	1	1	2
257858	蔡红英	42	162	47	17.9089	1	0	G1P1	1	2	1	2	13	2	T1bN0M0	T1b	1	乳头状癌	2	2	2
257978	黄燕	33	161	55	21.2183	2	0	G0P0	0	1	0	1	12	2	T1aN0M0	T1a	1	乳头状癌	2	2	2
257621	马秋玲	24	163	50	18.8189	2	0	G0P0	0	1	0	1	13	2	T1aN1aM0	T1a	1	乳头状癌	1	1	2
257986	唐启凤	42	150	53	23.5556	2	0	G1P1	1	2	1	2	13	2	T2N1aM0	T2	1	乳头状癌（巨滤泡亚型）	1	1	2
258105	景春娥	35	160	63	24.6094	3	0	G2P2	2	2	2	2	15	3	T1aN1bM0	T1a	1	乳头状癌	1	1	1
258085	李平	50	154	50	21.0828	2	0	G1P1	1	2	1	2	14	2	T1aN1aM0	T1a	1	乳头状癌	1	1	2
258098	胡婷婷	28	150	72	32	4	0	G0P0	0	1	0	1	13	2	T1bN1bM0	T1b	1	乳头状癌	1	1	1
258193	丁小平	41	155	49	20.3954	2	0	G3P1	3	3	1	2	17	3	T1aN1aM0	T1a	1	乳头状癌	1	1	2
00258405	许太平	30	155	53	22.0604	2	0	G3P1	3	3	1	2	12	2	T1aN0M0	T1a	1	乳头状癌	2	2	2
00257663	刘娟	30	160	48.5	18.9453	2	0	G2P1	2	2	1	2	11	1	T1aN0M0	T1a	1	乳头状癌	2	2	2
258162	刘翠云	33	165	62.5	22.9568	2	0	G5P3	5	4	3	3	11	1	T1aN0M0	T1a	1	乳头状癌	2	2	2
258839	王文倩	33	164	57.5	21.3786	2	母亲肝硬化，父亲高血压	G3P2	3	3	2	2	13	2	T1aN1aM0	T1a	1	乳头状癌	1	1	2
00258671	彭明娟	28	158	51	20.4294	2	0	G1P1	1	2	1	2	14	2	T1aN1aM0	T1a	1	乳头状癌	1	1	2
258665	何子桂@YZ	72	155	54	22.4766	2	0	G5P3	5	4	3	3	15	3	T4N1bM1	T4	5	乳头状癌	1	1	1
00258681	郭晓芳	26	159	46	18.1955	1	姑姑患有地方性甲状腺肿	G0P0	0	1	0	1	12	2	T1aN1bM0	T1a	1	乳头状癌	1	1	1
258877	吴瑕@	34	156	73	29.9967	4	0	G0P0	0	1	0	1	12	2	T1aN1bM0	T1a	1	乳头状癌	1	1	1
259089	陈加先*X	46	156	52	21.3675	2	0	G2P1	2	2	1	2	15	3	T1bN1bM0	T1b	1	乳头状癌	1	1	1
259225	姜福田@Y	61	150	59	26.2222	3	0	G4P2	4	3	2	2	18	3	T3N0M0	T3	1	乳头状癌	2	2	2
257318	王久容	53	162	59	22.4813	2	0	G2P1	2	2	1	2	17	3	T1aN0M0	T1a	1	乳头状癌	2	2	2
259515	李庆*	30	164	60	22.3081	2	0	G0P0	0	1	0	1	14	2	T1aN0M0	T1a	1	乳头状癌	2	2	2
259500	胡早霞	32	162	63.5	24.196	3	0	G2P2	2	2	2	2	13	2	T2N1bM0	T2	1	乳头状癌	1	1	1
259844	徐芳	44	153	59	25.204	3	0	G1P1	1	2	1	2	15	3	T4N1bM0	T4b	1	乳头状癌	1	1	1
259988	庞有芳*	62	156	70	28.764	4	0	G2P1	2	2	1	2	11	1	T4aN0M0	T4a	3	乳头状癌	2	2	2
00259865	陈媛媛	26	154	52	21.9261	2	0	G0P0	0	1	0	1	15	3	T3N1bM0	T3	1	乳头状癌	1	1	1
260250	汪秀华*	60	150	55	24.4444	3	0	G2P1	2	2	1	2	17	3	T1aN1aM0	T1a	2	乳头状癌	1	1	2
00260491	任冬梅	25	170	52	17.9931	1	0	G0P0	0	1	0	1	11	1	T1aN0M0	T1a	1	乳头状癌	2	2	2
260427	赵晓梅	38	152	53	22.9398	2	0	G2P1	2	2	1	2	12	2	T1aN1aM0	T1a	1	乳头状癌	1	1	2
260558	刘英*	33	158	51	20.4294	2	0	G1P1	1	2	1	2	14	2	T1aN0M0	T1a	1	乳头状癌	2	2	2
260566	刘倩*	30	159	57	22.5466	2	0	G0P0	0	1	0	1	14	2	T1bN1aM0	T1b	1	乳头状癌	1	1	2
260450	李枚*	42	152	51	22.0741	2	0	G1P1	1	2	1	2	13	2	T3N1bM0	T3	1	乳头状癌	1	1	1
00260517	李晓利	20	160	60	23.4375	2	0	G1P1	1	2	1	2	13	2	T4bN1bM0	T4b	1	乳头状癌	1	1	1
260666	林洁姝*	30	168	83	29.4076	4	0	G1P1	1	2	1	2	11	1	T1bN0M0	T1b	1	乳头状癌	2	2	2
260645	缪友凤	45	154	57	24.0344	3	0	G4P2	4	3	2	2	16	3	T1aN0M0	T1a	1	乳头状癌	2	2	2
260624	王明	43	151	48	21.0517	2	0	G1P1	1	2	1	2	16	3	T1aN1aM0	T1a	1	乳头状癌	1	1	2
260696	李天蓉*X	46	150	45	20	2	0	G1P1	1	2	1	2	18	3	T1aN1bM0	T1a	1	乳头状癌	1	1	1
00260730	张燕	19	164	48.5	18.0324	1	0	G0P0	0	1	0	1	15	3	T1bN1aM0	T1b	1	乳头状癌	1	1	2
260646	杨光琼	42	157	55	22.3133	2	0	G4P1	4	3	1	2	16	3	T4N0M0	T4	1	乳头状癌	2	2	2
261074	余敏	36	165	59.5	21.8549	2	父亲患有高血压，母亲患有肺癌	G1P1	1	2	1	2	14	2	T4aN1bM0	T4a	1	乳头状癌	1	1	1
261748	王群英	43	151	58	25.4375	3	母亲患有甲亢	G4P3	4	3	3	3	12	2	T1bN1bM0	T1b	1	乳头状癌	1	1	1
00261318	林薇	26	160	50	19.5312	2	0	G0P0	0	1	0	1	12	2	T2N1bM0	T2	1	乳头状癌（弥漫硬化性）伴桑葚体及鳞化	1	1	1
260407	吴莉梅*	48	164	62	23.0518	2	父亲患有高血压、糖尿病	G3P1	3	3	1	2	12	2	T1aN0M0	T1a	1	乳头状癌	2	2	2
00261520	刘婷	27	175	75	24.4898	3	0	G1P1	1	2	1	2	14	2	T4aN1bM0	T4a	1	乳头状癌	1	1	1
210127	张维华	73	142	49	24.3007	3	0	G2P1	2	2	1	2	14	2	T4bN1bM0	T4b	4	FTC	1	1	1
261245	曹秀丽	30	155	44.5	18.5224	2	0	G1P1	1	2	1	2	12	2	T1bN0M0	T1b	1	乳头状癌	2	2	2
00261917	李凤美	28	168	96	34.0136	4	0	G0P0	0	1	0	1	13	2	T2N1aM0	T2	1	乳头状癌	1	1	2
262055	衣格克哈	32	158	53	21.2306	2	0	G4P1	4	3	1	2	17	3	T2N1aM0	T2	1	乳头状癌	1	1	2
262058	李宣	61	160	56	21.875	2	0	G3P1	3	3	1	2	17	3	T1aN0M0	T1a	1	乳头状癌	2	2	2
261561	田朝秀	60	156	57.5	23.6275	2	0	G3P1	3	3	1	2	15	3	T1aN0M0	T1a	1	乳头状癌	2	2	2
00262011	袁稚洁	25	170	63	21.7993	2	0	G0P0	0	1	0	1	12	2	T1aN1bM0	T1a	1	乳头状癌	1	1	1
261286	张喜娟	40	157	54	21.9076	2	母亲乳腺癌，外祖父淋巴瘤	G2P1	2	2	1	2	13	2	T1bN1aM0	T1b	1	乳头状癌	1	1	2
00261585	李明丽	30	172	83	28.0557	4	0	G1P1	1	2	1	2	12	2	T1bN1aM0	T1b	1	乳头状癌	1	1	2
261590	王容仙	69	155	69	28.7201	4	0	G7P3	7	4	3	3	16	3	T2N1bM0	T2	2	乳头状癌	1	1	1
240556	黄雪芹	34	162	59	22.4813	2	0	G3P1	3	3	1	2	14	2	T2N1bM0	T2	1	乳头状癌	1	1	1
261270	连钗媚	57	157	58	23.5304	2	0	G2P2	2	2	2	2	13	2	T3N1bM0	T3	2	乳头状癌	1	1	1
260859	周芳子*	32	164	49	18.2183	1	0	G1P1	1	2	1	2	13	2	T1bN1bM0	T1b	1	乳头状癌	1	1	1
262195	魏雪梅*	38	160	55	21.4844	2	母亲患有乳腺癌	G1P1	1	2	1	2	14	2	T1aN0M0	T1a	1	乳头状癌	2	2	2
261003	李诗@	56	156	62	25.4767	3	0	G3P3	3	3	3	3	12	2	T4aN1bM0	T4a	4	乳头状癌	1	1	1
262358	徐德芳*	51	165	60.5	22.2222	2	0	G1P1	1	2	1	2	14	2	T1aN0M0	T1a	1	乳头状癌	2	2	2
00262357	李群	30	160	54	21.0938	2	0	G0P0	0	1	0	1	12	2	T1bN1bM0	T1b	1	乳头状癌	1	1	1
262375	易开英	60	155	62	25.8065	3	0	G1P1	1	2	1	2	12	2	T1aN0M0	T1a	1	乳头状癌	2	2	2
00261599	付玉良	25	155	62	25.8065	3	0	G2P1	2	2	1	2	11	1	T1aN1aM0	T1a	1	乳头状癌	1	1	2
262470	黄秀芳*	64	147	43	19.8991	2	父亲女儿患有类风湿	G3P1	3	3	1	2	14	2	T1bN1aM0	T1b	2	乳头状癌	1	1	2
262583	阿呷克布	32	158	70	28.0404	4	0	G1P1	1	2	1	2	12	2	T1bN1aM0	T1b	1	乳头状癌	1	1	2
263166	毛建容	57	160	54.5	21.2891	2	0	G3P1	3	3	1	2	14	2	T2N1aM0	T2	2	乳头状癌	1	1	2
262715	张玉兰@	58	152	52	22.5069	2	父亲患有肺癌	G1P1	1	2	1	2	11	1	T1aN1bM0	T1a	2	乳头状癌	1	1	1
246821	张凤兰	42	160	59	23.0469	2	0	G3P2	3	3	2	2	13	2	T2N0M0	T2	1	FTC	2	2	2
262817	汪利	38	163	70	26.3465	3	姐姐患有绒癌	G1P1	1	2	1	2	12	2	T1aN1bM0	T1a	1	乳头状癌	1	1	1
00262923	郭倩	28	163	61	22.9591	2	0	G0P0	0	1	0	1	14	2	T2N1bM0	T2	1	乳头状癌	1	1	1
263188	马俊义	56	165	58	21.3039	2	父亲患有高血压	G2P1	2	2	1	2	15	3	T1aN0M0	T1a	1	乳头状癌	2	2	2
00262986	李薇	26	148	58	26.4792	3	外祖父患有甲状腺癌，死于心脏病	G0P0	0	1	0	1	15	3	T1aN0M0	T1a	1	乳头状癌	2	2	2
263264	王春霞@YZ	33	160	59	23.0469	2	0	G2P2	2	2	2	2	14	2	T1aN0M0	T1a	1	乳头状癌	2	2	2
263253	李义芬*	57	157	62.5	25.356	3	妹妹患有乳腺癌	G1P1	1	2	1	2	15	3	T1bN1aM0	T1b	2	乳头状癌	1	1	2
00263420	杜曼	26	160	51	19.9219	2	三姨患有甲状腺癌，爷爷患有前列腺癌	G2P2	2	2	2	2	16	3	T1aN0M0	T1a	1	乳头状癌	2	2	2
263410	丁琼珍	53	154	63.5	26.7752	3	0	G4P4	4	3	4	3	17	3	T1bN0M0	T1b	1	乳头状癌	2	2	2
263425	毛淑文	86	152	57	24.6711	3	0	G6P6	6	4	6	4	16	3	T4N1aM0	T4	4	乳头状癌	1	1	2
261296	刘弥*	52	154	50	21.0828	2	0	G1P1	1	2	1	2	13	2	T1aN1aM0	T1a	1	乳头状癌	1	1	2
263546	苏羽斌	47	160	70	27.3438	3	0	G1P1	1	2	1	2	12	2	T1aN1aM0	T1a	1	乳头状癌	1	1	2
263549	张海霞	51	158	47	18.8271	2	0	G1P1	1	2	1	2	14	2	T1bN0M0	T1b	1	乳头状癌	2	2	2
263757	骆会	46	152	48	20.7756	2	0	G1P1	1	2	1	2	13	2	T1aN0M0	T1a	1	乳头状癌	2	2	2
263791	钟雪梅*	46	164	62.5	23.2377	2	0	G1P1	1	2	1	2	16	3	T1bN0M0	T1b	1	乳头状癌	2	2	2
263076	王素华*	59	150	59	26.2222	3	0	G2P1	2	2	1	2	11	3	T1aN1bM0	T1a	2	乳头状癌	1	1	1
00263058	李想	24	169	69	24.1588	3	0	G0P0	0	1	0	1	12	2	T2N1bM0	T2	1	乳头状癌	1	1	1
264068	郑祥芬*	51	157	70.5	28.6016	4	0	G2P1	2	2	1	2	13	2	T3N0M0	T3	1	乳头状癌	2	2	2
264099	张春英*	53	160	56	21.875	2	0	G3P1	3	3	1	2	13	2	T1aN0M0	T1a	1	乳头状癌	2	2	2
264044	唐荣珠*	36	158	53	21.2306	2	0	G1P1	1	2	1	2	14	2	T1aN1bM0	T1a	1	乳头状癌	1	1	1
264034	陈娅*	32	160	51	19.9219	2	0	G1P1	1	2	1	2	14	2	T1bN1bM0	T1b	1	乳头状癌	1	1	1
00264161	李燕	66	161	70	27.34	3	0	G4P3	4	4	3	3	15	3	T3N1bM0	T3	2	乳头状癌	1	1	1
264231	王舟芳*X	52	157.5	70	28.2187	4	0	G6P1	6	4	1	2	15	3	T1aN0M0	T1a	1	乳头状癌	2	2	2
264251	张静	44	160	56	21.875	2	0	G1P1	1	2	1	2	14	2	T1aN0M0	T1a	1	乳头状癌	2	2	2
263019	汪建英	50	157	65	26.3702	3	0	G5P1	5	4	1	2	13	2	T1aN1aM0	T1a	1	乳头状癌	1	1	2
264266	徐桂清	72	160	60	23.4375	2	母亲死于淋巴瘤	G3P3	3	3	3	3	14	2	T3N1bM0	T3	2	乳头状癌	1	1	1
00264341	张玲玲	27	155	46	19.1467	2	0	G1P1	1	2	1	2	15	3	T1bN1bM0	T1b	1	乳头状癌	1	1	1
264537	曾红	38	161	60	23.1473	2	0	G3P1	3	3	1	2	12	2	T1aN0M0	T1a	1	乳头状癌	2	2	2
263031	丁永明	81	150	75.5	33.5556	4	0	G2P2	2	2	2	2	13	2	T3N0M0	T3	2	乳头状癌	2	2	2
264754	蒋晓华*	45	160	45	17.5781	1	0	G3P2	3	3	2	2	16	3	T1aN0M0	T1a	1	乳头状癌	2	2	2
00264717	刘子香	26	156	42.5	17.4638	1	0	G0P0	0	1	0	1	13	2	T1aN0M0	T1a	1	乳头状癌	2	2	2
00263991	李春燕	24	169	51.5	18.0316	1	0	G1P1	1	2	1	2	13	2	T1aN0M0	T1a	1	乳头状癌	2	2	2
00264614	刘施驿	22	170	72	24.9135	3	0	G0P0	0	1	0	1	13	2	T1aN0M0	T1a	1	乳头状癌	2	2	2
264728	陈敏	56	158	70	28.0404	4	0	G2P2	2	2	2	2	12	2	T1aN0M0	T1a	1	乳头状癌	2	2	2
00265020	陈琴英	25	161	59	22.7615	2	0	G1P1	1	2	1	2	14	2	T1bN1bM0	T1b	1	乳头状癌	1	1	1
265211	牟志辉	41	151	49	21.4903	2	0	G6P2	6	4	2	2	13	2	T1aN1bM0	T1a	1	乳头状癌	1	1	1
265223	盛维玉	56	150	43.5	19.3333	2	0	G2P1	2	2	1	2	14	2	T1bN1aM0	T1b	2	乳头状癌	1	1	2
265326	李远芳*	46	153	47	20.0777	2	父亲患有肺癌	G1P1	1	2	1	2	13	2	T1aN0M0	T1a	1	乳头状癌	2	2	2
00265490	朱玮玮	29	165	53	19.4674	2	0	G3P1	3	3	1	2	12	2	T3N1bM0	T3	1	乳头状癌	1	1	1
265574	彭阴英*	42	165	70	25.7117	3	父母患有高血压，姨妈有甲状腺癌	G1P1	1	2	1	2	14	2	T1aN1aM0	T1a	1	乳头状癌	1	1	2
265565	黄花群*X	36	157	73	29.6158	4	父亲患有高血压	G1P1	1	2	1	2	13	2	T2N0M0	T2	1	乳头状癌	2	2	2
266036	苏小英	51	158	74	29.6427	4	0	G3P2	3	3	2	2	12	2	T1aN0M0	T1a	1	乳头状癌	2	2	2
265661	谢英莺Y	51	148	55	25.1096	3	0	G1P1	1	2	1	2	13	2	T1aN1bM0	T1a	1	乳头状癌	1	1	1
265681	朱平@	59	155	49	20.3954	2	父母患有高血压，父亲患有肺癌	G1P1	1	2	1	2	17	3	T1aN0M0	T1a	1	乳头状癌	2	2	2
265641	肖春	47	158	58	23.2335	2	父母患有高血压，父亲患有肝癌	G1P1	1	2	1	2	14	2	T1aN0M0	T1a	1	乳头状癌	2	2	2
00265695	杨小梅	28	165	46	16.8962	1	0	G1P1	1	2	1	2	14	2	T1aN0M0	T1a	1	乳头状癌	2	2	2
00265707	唐正娟	60	158	75	30.0433	4	0	G4P3	4	4	3	3	12	2	T4aN1bM0	T4a	3	乳头状癌	1	1	1
266079	苏玉兰*	41	155	55	22.8928	2	0	G4P2	4	3	2	2	16	3	T1bN0M0	T1b	1	乳头状癌	2	2	2
266414	张小玲	56	147	52	24.064	3	0	G2P2	2	2	2	2	14	2	T1aN0M0	T1a	1	乳头状癌	2	2	2
266413	彭永红*	45	165	56	20.5693	2	0	G1P1	1	2	1	2	12	2	T1aN1aM0	T1a	1	乳头状癌	1	1	2
266462	曾小娇	29	172	53	17.9151	1	0	G0P0	0	1	0	1	15	3	T1aN1aM0	T1a	1	乳头状癌	1	1	2
266495	张家芬	41	167	60	21.5139	2	0	G2P2	2	2	2	2	14	2	T1bN0M0	T1b	1	乳头状癌	2	2	2
00266449	谢金莲	22	154	49	20.6612	2	0	G1P1	1	2	1	2	13	2	T1bN1bM0	T1b	1	乳头状癌	1	1	1
00266373	何莉	21	163	57	21.4536	2	0	G2P2	2	2	2	2	14	2	T1aN0M0	T1a	1	乳头状癌	2	2	2
266670	周敏*	55	152	59	25.5367	3	0	G1P1	1	2	1	2	13	2	T4aN1aM0	T4a	3	乳头状癌	1	1	2
266690	李彬*	37	159	54	21.3599	2	0	G2P2	2	2	2	2	15	3	T2N1bM0	T2	1	乳头状癌	1	1	1
266753	林艳玲*	34	170	68	23.5294	2	0	G0P0	0	1	0	1	14	2	T1aN1aM0	T1a	1	乳头状癌	1	1	2
266640	唐永桂@	70	154	53	22.3478	2	0	G2P2	2	2	2	2	11	3	T4aN1bM0	T4a	3	乳头状癌	1	1	1
266811	任泰辉	44	162	55	20.9572	2	0	G4P1	4	3	1	2	13	2	T1bN1aM0	T1b	1	乳头状癌	1	1	2
00266642	李玉霞	25	163	51	19.1953	2	0	G1P1	1	2	1	2	12	2	T1bN1aM0	T1b	1	乳头状癌	1	1	2
266542	邓菊华*	48	154	57	24.0344	3	0	G5P1	5	4	1	2	13	2	T3N0M0	T3	1	乳头状癌	2	2	2
00267010	刘婷	21	161	44	16.9747	1	0	G0P0	0	1	0	1	14	2	T1aN1bM0	T1a	1	乳头状癌	1	1	1
266887	张红梅*	46	163	60	22.5827	2	0	G3P1	3	3	1	2	7	1	T1bN0M0	T1b	1	乳头状癌	2	2	2
00267013	范晓碧	19	160	46	17.9688	1	0	G0P0	0	1	0	1	12	2	T2N1aM0	T2	1	乳头状癌	1	1	2
00267051	欧高惠	18	165	61	22.4059	2	0	G0P0	0	1	0	1	12	2	T2N1bM0	T2	1	乳头状癌	1	1	1
267178	徐素茹@	68	161	60	23.1473	2	0	G2P2	2	2	2	2	14	2	T1aN0M0	T1a	1	乳头状癌	2	2	2
267143	刘英*	45	163	54	20.3244	2	0	G3P1	3	3	1	2	13	2	T1bN1aM0	T1b	1	乳头状癌	1	1	2
266026	刘皎	32	161	56	21.6041	2	0	G1P1	1	2	1	2	14	2	T1aN0M0	T1a	1	乳头状癌	2	2	2
267225	黄菊*	34	157	49	19.8791	2	奶奶患有食道癌，父亲患有高血压	G1P1	1	2	1	2	11	1	T1aN0M0	T1a	1	乳头状癌	2	2	2
267326	侯静*	33	167	59	21.1553	2	0	G1P1	1	2	1	2	13	2	T2N0M0	T2	1	乳头状癌	2	2	2
267471	曾顺育	52	160	67	26.1719	3	母亲患有高血压	G1P1	1	2	1	2	13	2	T1aN0M0	T1a	1	乳头状癌	2	2	2
267416	蒋小琼	34	160	50	19.5312	2	父亲患有高血压	G2P2	2	2	2	2	14	2	T1bN0M0	T1b	1	乳头状癌	2	2	2
267501	杨华晴	37	158	52	20.83	2	0	G1P1	1	2	1	2	14	2	T1aN1aM0	T1a	1	乳头状癌	1	1	2
267540	孙莲*	33	153	63	26.9127	3	0	G1P1	1	2	1	2	12	2	T1aN0M0	T1a	1	乳头状癌	2	2	2
00267631	张欣慧	19	157	46	18.662	2	0	G0P0	0	1	0	1	12	2	T3N1bM0	T3	1	乳头状癌	1	1	1
266996	周海惠	55	155	62	25.8065	3	0	G3P2	3	3	2	2	13	2	T2N1bM0	T2	2	乳头状癌	1	1	1
267710	黄敏玉	42	153	51	21.7865	2	0	G1P1	1	2	1	2	13	2	T1aN1aM0	T1a	1	乳头状癌	1	1	2
00266944	孙雪晴	18	167	53	19.0039	2	0	G0P0	0	1	0	1	14	2	T1bN1aM0	T1b	1	乳头状癌	1	1	2
00267715	刘雪	22	158	48	19.2277	2	0	G0P0	0	1	0	1	14	2	T1bN1bM0	T1b	1	乳头状癌	1	1	1
267744	曾建春	51	164	70	26.0262	3	0	G1P1	1	2	1	2	14	2	T1aN1bM0	T1a	1	乳头状癌	1	1	1
268092	何运昉	59	161	58	22.3757	2	0	G2P0	2	2	0	1	15	3	T1aN0M0	T1a	1	乳头状癌	2	2	1
268074	赖秀芳	52	156	68	27.9421	3	0	G1P1	1	2	1	2	14	2	T1aN0M0	T1a	1	乳头状癌	2	2	2
266951	谢克梅*	32	155	64	26.6389	3	0	G1P1	1	2	1	2	13	2	T1aN0M0	T1a	1	乳头状癌	2	2	2
267869	郑蓉*X	44	156	53	21.7784	2	0	G5P1	5	4	1	2	13	2	T1aN1aM0	T1a	1	乳头状癌	1	1	2
268207	黄晓梅	46	163	62	23.3355	2	0	G1P1	1	2	1	2	15	3	T1aN0M0	T1a	1	乳头状癌	2	2	2
268130	徐明利	37	164	56	20.8209	2	0	G1P1	1	2	1	2	14	2	T1bN1bM0	T1b	1	乳头状癌	1	1	1
269502	邹华	45	167	67	24.0238	3	0	G1P1	1	2	1	2	17	3	T1aN1bM0	T1a	1	乳头状癌	1	1	1
268448	梁正君	52	142	55	27.2763	3	0	G1P1	1	2	1	2	14	2	T1aN1aM0	T1a	1	乳头状癌	1	1	2
266090	王秀华	72	150	50	22.2222	2	0	G6P3	6	4	3	3	10	1	T4aN1aM0	T4	3	乳头状癌	1	1	1
00268596	胡筱萱	26	152	46	19.91	2	0	G1P1	1	2	1	2	14	2	T1aN0M0	T1a	1	乳头状癌	2	2	2
269508	文月华	62	150	59	26.2222	3	0	G5P2	5	4	2	2	15	3	T3N1bM0	T3	2	乳头状癌	1	1	1
00268686	袁园巍	25	160	49	19.1406	2	0	G0P0	0	1	0	1	15	3	T1aN1aM0	T1a	1	乳头状癌	1	1	2
269545	代争*	33	158	41	16.4237	1	0	G1P1	1	2	1	2	14	2	T1bN1aM0	T1b	1	乳头状癌	1	1	2
268785	陈涛	42	166	62	22.4996	2	父亲患有肝癌	G1P1	1	2	1	2	15	3	T1bN1bM0	T1b	1	乳头状癌	1	1	1
268833	余丽琼*X	50	152	47	20.3428	2	0	G4P2	4	3	2	2	11	1	T1bN1bM0	T1b	1	乳头状癌	1	1	1
268969	董莉萍	33	152	62	26.8352	3	0	G1P1	1	2	1	2	14	2	T1aN0M0	T1a	1	乳头状癌	2	2	2
00269161	王小菊	28	158	70	28.0404	4	0	G0P0	0	1	0	1	11	1	T1aN1bM0	T1a	1	乳头状癌	1	1	1
00269402	黄孟菲	28	160	66	25.7812	3	0	G1P1	1	2	1	2	12	2	T1bN1bM0	T1b	1	乳头状癌	1	1	1
269037	郭晓华*	43	160	66	25.7812	3	0	G1P1	1	2	1	2	14	2	T1aN0M0	T1a	1	乳头状癌	2	2	2
269359	李冬华	51	156	73	29.9967	4	0	G1P1	1	2	1	2	15	3	T4N1bM0	T4	1	乳头状癌	1	1	1
269282	唐建如	50	160	60	23.4375	2	0	G1P1	1	2	1	2	13	2	T1aN1aM0	T1a	1	乳头状癌	1	1	2
269604	李尼双毛	41	156	65	26.7094	3	0	G3P3	3	3	3	3	14	2	T4N1bM0	T4	1	乳头状癌	1	1	1
00270098	白雪	19	163	54	20.3244	2	0	G0P0	0	1	0	1	13	2	T2N1bM0	T2	1	乳头状癌	1	1	1
269859	廖小清	32	153	52	22.2137	2	0	G2P1	2	2	1	2	15	3	T1aN0M0	T1a	1	乳头状癌	2	2	2
270419	赵乙潞*	39	158	41	16.4237	1	0	G1P1	1	2	1	2	14	2	T1aN1aM0	T1a	1	乳头状癌	1	1	2
270478	阿的牛留木	43	160	64	25	3	0	G2P2	2	2	2	2	14	2	T4N1aM0	T4	1	乳头状癌	1	1	2
270533	李红	44	159	55	21.7555	2	0	G2P1	2	2	1	2	16	3	T2N1bM0	T2	1	乳头状癌	1	1	2
270514	何韵	48	152	50	21.6413	2	0	G0P0	0	1	0	1	12	2	T1aN0M0	T1a	1	乳头状癌	2	2	2
00270601	周慧君	23	153	37	15.8059	1	0	G1P1	1	2	1	2	13	2	T1bN1bM0	T1b	1	乳头状癌	1	1	1
270580	李素芳	63	157	63	25.5588	3	0	G2P1	2	2	1	2	12	2	T4N1bM0	T4	4	乳头状癌	1	1	1
00003012	张秀凤	28	158	58	23.2335	2	0	G1P1	1	2	1	2	14	2	T1aN0M0	T1a	1	乳头状癌	2	2	2
270857	刘严芳*	58	147	56	25.9151	3	0	G2P1	2	2	1	2	9	1	T4aN1bM0	T4a	3	乳头状癌	1	1	1
00270841	曾娇	24	158	53	21.2306	2	0	G1P1	1	2	1	2	12	2	T2N1bM0	T2	1	乳头状癌	1	1	1
00270986	李怡灵	24	161	43	16.5889	1	0	G0P0	0	1	0	1	14	2	T1bN1aM0	T1b	1	乳头状癌	1	1	2
267578	王莉琼	40	167	72	25.8166	3	0	G1P1	1	2	1	2	12	2	T3N1bM0	T3	1	乳头状癌	1	1	1
271166	张秀英	56	161	76	29.3199	4	0	G3P3	3	3	3	3	10	1	T1aN1bM0	T1a	2	乳头状癌	1	1	1
271048	周英*	52	150	60	26.6667	3	0	G3P3	3	3	3	3	15	3	T1aN0M0	T1a	1	乳头状癌	2	2	2
271117	郭纯芳@Y	57	164	53	19.7055	2	0	G2P1	2	2	1	2	14	2	T1aN0M0	T1a	1	乳头状癌	2	2	2
271465	叶汝芝	69	148	54	24.653	3	0	G1P1	1	2	1	2	14	2	T1bN0M0	T1b	1	乳头状癌	2	2	2
271232	孙晓慧	34	160	59	23.0469	2	0	G1P1	1	2	1	2	13	2	T1bN1aM0	T1b	1	乳头状癌	1	1	2
00271391	林秀丽	30	164	52	19.3337	2	0	G0P0	0	1	0	1	11	1	T1aN0M0	T1a	1	乳头状癌	2	2	2
289342	倪卓敏	45	160	62	24.2188	3	0	G0P0	0	1	0	1	12	2	T4aN1aM0	T4a	1	乳头状癌	1	1	2
271490	张莉瑜	45	159	55	21.7555	2	0	G1P1	1	2	1	2	14	2	T1aN0M0	T1a	1	乳头状癌	2	2	2
271473	刘群	38	153	57	24.3496	3	0	G4P2	4	3	2	2	13	2	T1aN0M0	T1a	1	乳头状癌	2	2	2
271046	陈兰芳	63	147	46	21.2874	2	0	G4P4	4	3	4	3	17	3	T4N1bM0	T4	4	乳头状癌	1	1	1
00271541	梁倩	25	155	65	27.0552	3	0	G0P0	0	1	0	1	14	2	T1bN1bM0	T1b	1	乳头状癌	1	1	1
00271528	赵古吉	30	150	44	19.5556	2	0	G0P0	0	1	0	1	12	2	T3N0M0	T3	1	乳头状癌	2	2	2
00270946	张萌	24	158	47	18.8271	2	0	G0P0	0	1	0	1	13	2	T1bN1aM0	T1b	1	乳头状癌	1	1	2
00271756	刘亚竹	29	165	55	20.202	2	0	G0P0	0	1	0	1	14	2	T1bN1aM0	T1b	1	乳头状癌	1	1	2
271880	刘琳华*	33	161	55	21.2183	2	0	C3P1	3	3	1	2	12	2	T1aN1bM0	T1a	1	乳头状癌	1	1	1
271863	宋英*X	43	165	59	21.6713	2	0	G1P1	1	2	1	2	15	3	T1bN0M0	T1b	1	乳头状癌	2	2	2
00272303	杜佳蔚	30	169	62	21.7079	2	0	G0P0	0	1	0	1	15	3	T1aN1aM0	T1a	1	乳头状癌	1	1	2
272340	邓英*	49	157	48	19.4734	2	0	G3P2	3	3	2	2	12	2	T1aN1bM0	T1a	1	乳头状癌	1	1	1
00272118	任思琪	22	168	80	28.3447	4	0	G0P0	0	1	0	1	12	2	T1aN0M0	T1a	1	乳头状癌	2	2	2
272387	白利蓉	39	161	71	27.3909	3	0	G3P1	3	3	1	2	13	2	T1aN0M0	T1a	1	乳头状癌	2	2	2
272805	徐金红YT	41	162	59	22.4813	2	0	G1P1	1	2	1	2	12	2	T2N0M0	T2	1	乳头状癌	2	2	2
272455	李志容	51	160	74	28.9062	4	0	G2P2	2	2	2	2	13	2	T1aN1bM0	T1a	1	乳头状癌	1	1	1
272588	张玉珍	51	156	58	23.833	2	0	G4P3	4	3	3	3	15	3	T1aN1aM0	T1a	1	乳头状癌	1	1	2
272695	邹泽凤*	41	165	63	23.1405	2	0	G1P1	1	2	1	2	12	2	T1aN1aM0	T1a	1	乳头状癌	1	1	2
00003325	周蝉	27	158	55	22.0317	2	0	G3P2	3	3	2	2	15	3	T1aN0M0	T1a	1	乳头状癌	2	2	2
272958	李年荣	54	160	68	26.5625	3	0	G5P2	5	4	2	2	12	2	T3N1aM0	T3	1	乳头状癌	1	1	2
272909	袁红琼*	36	160	49	19.1406	2	0	G1P1	1	2	1	2	14	2	T1aN0M0	T1a	1	乳头状癌	2	2	2
00272999	高溪咛	23	168	66	23.3844	2	0	G0P0	0	1	0	1	13	2	T1bN1bM0	T1b	1	乳头状癌	1	1	1
273272	雷小玲*	37	153	56	23.9224	2	0	G1P1	1	2	1	2	13	2	T1aN0M0	T1a	1	乳头状癌	2	2	2
272746	樊小红*	34	160	61	23.8281	2	0	G3P1	3	3	1	2	13	2	T3N0M0	T3	1	乳头状癌	2	2	2
273307	胡华@Y01	42	160	60	23.4375	2	0	G2P1	2	2	1	2	15	3	T1aN0M0	T1a	1	乳头状癌	2	2	2
273546	申晓岚*	56	152	59	25.5367	3	0	G1P1	1	2	1	2	15	3	T3N0M0	T3	2	乳头状癌	2	2	2
273881	蒋继华*	54	152	47	20.3428	2	0	G3P2	3	3	2	2	15	3	T1aN1bM0	T1a	1	乳头状癌	1	1	1
273871	余红	41	167	60	21.5139	2	0	G4P2	4	3	2	2	16	3	T2N0M0	T2	1	乳头状癌	2	2	2
00273884	费宏阳	30	161	52	20.061	2	0	G0P0	0	1	0	1	13	2	T2N1aM0	T2	1	乳头状癌	1	1	2
273983	周后英	49	153	57	24.3496	3	0	G7P3	7	4	3	3	13	2	T4N1aM0	T4	1	乳头状癌	1	1	2
274049	胡敏侠*	40	160	68	26.5625	3	0	G3P2	3	3	2	2	12	2	T1aN0M0	T1a	1	乳头状癌	2	2	2
274135	冯丽华@Y	35	155	62	25.8065	3	0	G1P1	1	2	1	2	12	2	T1aN1aM0	T1a	1	乳头状癌	1	1	2
00274147	罗茜	19	158	52	20.83	2	0	G0P0	0	1	0	1	12	2	T2N1bM0	T2	1	乳头状癌	1	1	1
00273460	徐玮	23	170	58	20.0692	2	0	G0P0	0	1	0	1	14	2	T3N1bM0	T3	1	乳头状癌	1	1	1
00001063	甘琦林	29	165	50	18.3655	1	0	G2P1	2	2	1	2	11	1	T1aN0M0	T1a	1	乳头状癌	2	2	2
229489	程华*	40	165	56	20.5693	2	0	G2P1	2	2	1	2	13	2	T1aN0M0	T1a	1	乳头状癌	2	2	2
275471	刘俊文	58	140	45	22.9592	2	0	G3P2	3	3	2	2	14	2	T3N1bM0	T3	2	乳头状癌	1	1	1
274586	赵忠	47	160	56	21.875	2	侄女患有甲状腺癌	G1P1	1	2	1	2	11	1	T1aN1aM0	T1a	1	乳头状癌	1	1	2
00274716	张晓琴	21	168	56	19.8413	2	0	G0P0	0	1	0	1	12	2	T1bN0M0	T1b	1	乳头状癌	2	2	2
271098	陈述芳	18	162	59	22.4813	2	0	G0P0	0	1	0	1	13	2	T1bN1aM0	T1b	1	乳头状癌	1	1	2
00274108	雷丽霞	24	144	41	19.7724	2	0	G0P0	0	1	0	1	13	2	T3N1aM0	T3	1	乳头状癌	1	1	2
274611	曹丰容	41	155	66	27.4714	3	0	G2P2	2	2	2	2	14	2	T1aN0M0	T1a	1	乳头状癌	2	2	2
198735	窦豫兰*	56	168	75	26.5731	3	0	G2P2	2	2	2	2	13	2	T1aN0M0	T1a	1	乳头状癌	2	2	2
00275447	陈琳	20	155	42	17.4818	1	0	G0P0	0	1	0	1	13	2	T3N1bM0	T3	1	乳头状癌	1	1	1
274222	郭宝萍	53	166	57	20.6852	2	家族中有甲状腺癌患者	G1P1	1	2	1	2	14	2	T1aN0M0	T1a	1	乳头状癌	2	2	2
275792	朱彦陶@YZ	38	160	61	23.8281	2	0	G1P1	1	2	1	2	13	2	T1aN0M0	T1a	1	乳头状癌	2	2	2
276114	任水群*X	52	160	60	23.4375	2	父亲患有脑溢血	G1P1	1	2	1	2	14	2	T1aN0M0	T1a	1	乳头状癌	2	2	2
00276103	宋弘	23	155	66	27.4714	3	0	G0P0	0	1	0	1	14	2	T1aN1aM0	T1a	1	乳头状癌	1	1	2
275285	高立洵*	35	165	75	27.5482	3	家族中有甲状腺癌患者，母亲患有甲亢，父亲患有膀胱癌	G1P1	1	2	1	2	12	2	T2N1bM0	T2	1	乳头状癌	1	1	1
276393	黄碧容	51	156	76	31.2295	4	0	G2P2	2	2	2	2	15	3	T1bN0M0	T1b	1	乳头状癌	2	2	2
276441	罗祖琼	45	152	60	25.9695	3	0	G4P1	4	3	1	2	16	3	T4N1bM0	T4	1	乳头状癌	1	1	1
276559	刘英@	44	164	74	27.5134	3	0	G1P1	1	2	1	2	15	3	T1aN0M0	T1a	1	乳头状癌	2	2	2
277160	顾明芬	47	158	57	22.8329	2	0	G2P1	2	2	1	2	15	3	T1aN1aM0	T1a	1	乳头状癌	1	1	2
276533	周贤翠YT	41	160	71	27.7344	3	0	G2P2	2	2	2	2	14	2	T1aN1aM0	T1a	1	乳头状癌	1	1	2
276498	吴素兰*	66	145	45	21.4031	2	0	G1P1	1	2	1	2	16	3	T1bN1bM0	T1b	2	乳头状癌	1	1	1
276712	文华YT	41	167	54	19.3625	2	0	G3P2	3	3	2	2	14	2	T1aN0M0	T1a	1	乳头状癌	2	2	2
00276753	卢珊	29	158	51	20.4294	2	0	G2P2	2	2	2	2	15	3	T1aN1aM0	T1a	1	乳头状癌	1	1	2
277122	陈捷	21	158	50	20.0288	2	0	G0P0	0	1	0	1	14	2	T1aNxM0	T1a	1	乳头状癌	1	1	2
276994	张秀莲*X	41	160	51	19.9	2	0	G1P1	1	2	1	2	13	2	T1aN0M0	T1a	1	乳头状癌	2	2	2
277367	张赤*	47	164	52	19.3337	2	0	G4P1	4	3	1	2	14	2	T1aN0M0	T1a	1	乳头状癌	2	2	2
00277274	王英	28	162	50	19.052	2	0	G2P1	2	2	1	2	11	1	T1bN1bM0	T1b	1	乳头状癌	1	1	1
00276140	刘亚竹	25	155	46	19.1467	2	父亲患有下咽癌	G0P0	0	1	0	1	12	2	T1aN0M0	T1a	1	乳头状癌	2	2	2
277614	张建*	46	160	62	24.2188	3	0	G3P2	3	3	2	2	13	2	T1aN0M0	T1a	1	乳头状癌	2	2	2
00278048	张星悦	22	164	49	18.2183	1	0	G0P0	0	1	0	1	16	3	T4aN1bM0	T4a	1	乳头状癌	1	1	1
280670	周书平	31	158	87	34.8502	4	小姨患有甲状腺癌	G2P1	2	2	1	2	11	1	T1bN0M0	T1b	1	乳头状癌	2	2	2
00278379	李红梅	21	167	61	21.8724	2	0	G0P0	0	1	0	1	13	2	T2N1aM0	T2	1	乳头状癌	1	1	2
278227	王志芬	43	163	70	26.3465	3	0	G1P1	1	2	1	2	15	3	T1aN0M0	T1a	1	乳头状癌	2	2	2
00278664	石春红	29	161	63	24.3046	3	0	G0P0	0	1	0	1	14	2	T2N1aM0	T2	1	乳头状癌	1	1	2
00278779	刘伟玲	28	157	44	17.8506	1	0	G1P1	1	2	1	2	13	2	T1bN1aM0	T1b	1	乳头状癌	1	1	2
00278999	丁文琴	28	160	88	34.375	4	0	G2P1	2	2	1	2	11	1	T3N1aM0	T3	1	乳头状癌	1	1	2
00279120	蒲越	27	160	46	17.9688	1	0	G1P1	1	2	1	2	14	2	T2N1bM0	T2	1	乳头状癌	1	1	1
00279421	熊小燕	28	160	59	23.0469	2	0	G0P0	0	1	0	1	13	2	T4N1aM0	T4	1	乳头状癌	1	1	2
00279431	李子萍	30	152	53	22.9398	2	0	G0P0	0	1	0	1	11	1	T1bN1aM0	T1b	1	乳头状癌	1	1	2
00279477	罗玉玲	19	153	43	18.369	1	0	G0P0	0	1	0	1	13	2	TxN1bM0	Tx	1	乳头状癌	1	1	1
279760	王莉*	34	157	57	23.1247	2	0	G1P1	1	2	1	2	15	3	T1bN1aM0	T1b	1	乳头状癌	1	1	2
280238	毛秀英	58	158	74	29.6427	4	0	G2P2	2	2	2	2	16	3	T1aN0M0	T1a	1	乳头状癌	2	2	2
00280363	潘旭英	30	158	59	23.634	2	0	G0P0	0	1	0	1	13	2	T1aN1aM0	T1a	1	乳头状癌	1	1	2
280126	陈春蓝*	39	155	60	24.974	3	0	G2P2	2	2	2	2	14	2	T3N1bM0	T3	1	乳头状癌	1	1	1
280303	宋加玉	45	156	72	29.5858	4	0	G2P2	2	2	2	2	15	3	T3N1bM0	T3	1	乳头状癌	1	1	1
00271678	洪祖菊	28	153	42	17.9418	1	0	G2P1	2	2	1	2	11	1	T1aN0M0	T1a	1	乳头状癌	2	2	2
280157	李开蓉	50	155	70	29.1363	4	妹妹患有甲状腺结节，父亲患有脑溢血	G1P1	1	2	1	2	12	2	T1bN1aM0	T1b	1	乳头状癌	1	1	2
280422	李涤成*	47	168	53	18.7783	2	家族中有甲状腺癌患者，母亲患有甲亢	G1P1	1	2	1	2	15	3	T1aN0M0	T1a	1	乳头状癌	2	2	2
00256725	廖天月	21	168	58	20.5499	2	0	G0P0	0	1	0	1	15	3	T4aN1aM0	T4a	1	乳头状癌	1	1	2
280889	胡芳淑	39	160	65	25.3906	3	姐姐患有甲状腺结节	G5P2	5	4	2	2	13	2	T1aN0M0	T1a	1	乳头状癌	2	2	2
280954	张德菊YZ	48	153	75	32.039	4	0	G1P1	1	2	1	2	16	3	T1aN0M0	T1a	1	乳头状癌	2	2	2
281117	郭翠娥	52	153	60	25.6312	3	0	G1P1	1	2	1	2	17	3	T3N0M0	T3	1	乳头状癌	2	2	2
281189	胡芳芳	45	162	68	25.9107	3	妹妹患有甲状腺乳头状癌	G1P1	1	2	1	2	14	2	T1aN0M0	T1a	1	乳头状癌	2	2	2
281180	覃妮@YZ	42	165	61	22.4059	2	0	G3P1	3	3	1	2	12	2	T1aN0M0	T1a	1	乳头状癌	2	2	2
281148	丁琼	36	160	76	29.6875	4	0	G0P0	0	1	0	1	12	2	T1bN1bM0	T1b	1	乳头状癌	1	1	1
00281302	邹巧都	27	163	53	19.9481	2	外公患有糖尿病	G0P0	0	1	0	1	12	2	T1aN0M0	T1a	1	乳头状癌	2	2	2
00281215	罗兴容	23	154	52	21.9261	2	0	G0P0	0	1	0	1	13	2	T2N1bM0	T2	1	乳头状癌	1	1	1
281358	白灿	28	157	55	22.3133	2	祖母患有颈部肿瘤，具体不详	G0P0	0	1	0	1	15	3	T1aN0M0	T1a	1	乳头状癌	2	2	2
00281461	袁杰	28	159	66	26.1066	3	0	G0P0	0	1	0	1	15	3	T3N1bM0	T3	1	乳头状癌	1	1	1
00281599	黄瑶	23	154	43	18.1312	1	0	G0P0	0	1	0	1	14	2	T2N0M0	T2	1	乳头状癌	2	2	2
264416	梅晓辉	49	155	65	27.0552	3	0	G3P1	3	3	1	2	14	2	T1aN1aM0	T1a	1	乳头状癌	1	1	2
279801	朱照桂YT	68	148	56	25.5661	3	0	G3P3	3	3	3	3	18	3	T4aN1aM0	T4a	3	乳头状癌	1	1	2
281855	周明惠	46	165	62	22.7732	2	0	G2P2	2	2	2	2	13	2	T1aN1aM0	T1a	1	乳头状癌	1	1	2
00281948	马艺丹	24	171	62	21.2031	2	0	G0P0	0	1	0	1	12	2	T1aN1bM0	T1a	1	乳头状癌	1	1	1
00281842	刘利	28	155	51	21.2279	2	0	G2P1	2	2	1	2	11	1	T1aN0M0	T1a	1	乳头状癌	2	2	2
00281943	吴丹丹	29	162	56	21.3382	2	0	G0P0	0	1	0	1	12	2	T2N1bM0	T2	1	乳头状癌	1	1	1
00282084	刘茜	30	163	55	20.7008	2	0	G0P0	0	1	0	1	12	2	T1bN1bM0	T1b	1	乳头状癌	1	1	1
00282099	李岚	29	152	56	24.2382	3	0	G4P2	4	3	2	2	12	2	T1bN0M0	T1b	1	乳头状癌	2	2	2
282240	李隆秀*	54	158	55	22.0317	2	家族高血压病史	G2P1	2	2	1	2	12	2	T1aN0M0	T1a	1	乳头状癌	2	2	2
282301	李中秀YZ	52	158	62	24.8358	3	0	G8P1	8	4	1	2	16	3	T1aN0M0	T1a	1	乳头状癌	2	2	2
280409	熊用琼	41	164	68	25.2826	3	0	G1P1	1	2	1	2	12	2	T1bN1bM0	T1b	1	乳头状癌	1	1	1
00282198	黄茜	19	165	54	19.8347	2	0	G0P0	0	1	0	1	13	2	T3N1bM0	T3	1	乳头状癌	1	1	1
282530	周厚芹	46	160	61	23.8281	2	0	G1P1	1	2	1	2	12	2	T1bN0M0	T1b	1	乳头状癌	2	2	2
283056	李波	45	158	58	23.2335	2	0	G2P1	2	2	1	2	15	3	T1aN0M0	T1a	1	乳头状癌	2	2	2
282852	陈晓明YZ	40	167	68	24.3824	3	0	G2P2	2	2	2	2	14	2	T4aN1aM0	T4a	1	乳头状癌	1	1	2
283099	王群学*	47	158	49	19.6283	2	0	G1P1	1	2	1	2	13	2	T1aN0M0	T1a	1	乳头状癌	2	2	2
283167	范明秀*	70	158	60	24.0346	3	0	G3P3	3	3	3	3	12	2	T1bN1aM0	T1b	2	乳头状癌	1	1	2
283507	向元蓉*	52	158	62	24.8358	3	0	G1P1	1	2	1	2	13	2	T1aN1aM0	T1a	1	乳头状癌	1	1	2
283670	吴小平*	61	145	39	18.5493	2	0	G2P1	2	2	1	2	14	2	T1aN1aM0	T1a	2	乳头状癌	1	1	2
283697	陈世霜	30	150	45	20	2	0	G2P1	2	2	1	2	12	2	T1aN1aM0	T1a	1	乳头状癌	1	1	2
283764	伍婷*	30	163	57	21.4536	2	祖母死于乳腺癌	G0P0	0	1	0	1	13	2	T1aN1aM0	T1a	1	乳头状癌	1	1	2
283739	冯艳华	47	158	65	26.0375	3	0	G3P1	3	3	1	2	15	3	T1bN1aM0	T1b	1	乳头状癌	1	1	2
284015	张水英	50	156	71	29.1749	4	0	G1P1	1	2	1	2	13	2	T1aN0M0	T1a	1	乳头状癌	2	2	2
284020	陶晓玲	44	157	49	19.8791	2	0	G1P1	1	2	1	2	14	2	T1bN1aM0	T1b	1	乳头状癌	1	1	2
284194	田桂群YZ	53	158	68	27.2392	3	0	G5P2	5	4	2	2	13	2	T4N1aM0	T4	1	乳头状癌	1	1	2
284317	胡洪萍*	37	165	59	21.6713	2	0	G4P2	4	3	2	2	13	2	T1aN1aM0	T1a	1	乳头状癌	1	1	2
00283881	杜勤	29	155	46	19.1467	2	0	G1P1	1	2	1	2	14	2	T1bN0M0	T1b	1	乳头状癌	2	2	2
00283880	马艺榕	20	160	48	18.75	2	0	G0P0	0	1	0	1	12	2	T3N1bM0	T3	1	乳头状癌	1	1	1
284261	王桂英	53	152	51	22.0741	2	0	G2P1	2	2	1	2	15	3	T1aN0M0	T1a	1	乳头状癌	2	2	2
00277959	罗倩倩	29	160	46	17.9688	1	0	G3P3	3	3	3	3	15	3	T1aN1aM0	T1a	1	乳头状癌	1	1	2
00284464	张馨月	25	165	59	21.6713	2	0	G1P1	1	2	1	2	15	3	T1bN1aM0	T1b	1	乳头状癌	1	1	2
284705	黄静	35	163	57	21.4536	2	0	G1P1	1	2	1	2	14	2	T1aN1aM0	T1a	1	乳头状癌	1	1	2
00284770	吴瑗璐	25	154	53	22.3478	2	0	G0P0	0	1	0	1	14	2	T1bN1aM0	T1b	1	乳头状癌	1	1	2
00284932	蔡译玮	25	169	51	17.8565	1	0	G0P0	0	1	0	1	12	2	T1aN1aM0	T1a	1	乳头状癌	1	1	2
273632	童锐锋	48	154	53	22.3478	2	0	G1P1	1	2	1	2	14	2	T1aN1aM0	T1a	1	乳头状癌	1	1	2
00284837	成霞	24	153	54	23.0681	2	0	G0P0	0	1	0	1	12	2	T1aN1aM0	T1a	1	乳头状癌	1	1	2
00284878	杨霞	25	155	48	19.9792	2	0	G0P0	0	1	0	1	15	3	T1bN1aM0	T1b	1	乳头状癌	1	1	2
00285296	陈燕	29	165	55	20.202	2	0	G0P0	0	1	0	1	12	2	T1aN1aM0	T1a	1	乳头状癌	1	1	2
285494	付小蓉*	52	155	69	28.7201	4	0	G1P1	1	2	1	2	13	2	T1aN0M0	T1a	1	乳头状癌	2	2	2
285561	王素英*	52	155	56	23.3091	2	0	G1P1	1	2	1	2	16	3	T1bN0M0	T1b	1	乳头状癌	2	2	2
285585	吴欢	30	160	49	19.1406	2	0	G1P1	1	2	1	2	13	2	T1aN0M0	T1a	1	乳头状癌	2	2	2
285538	罗丽	31	162	50	19.052	2	0	G0P0	0	1	0	1	12	2	T1aN1bM0	T1a	1	乳头状癌	1	1	1
285711	赵碧辉*	44	153	53	22.6409	2	0	G9P2	9	4	2	2	14	2	T1bN0M0	T1b	1	乳头状癌	2	2	2
00285761	王徐	28	158	48	19.2277	2	0	G1P1	1	2	1	2	14	2	T1bN1aM0	T1b	1	乳头状癌	1	1	2
00285719	何姣霖	29	158	62	24.8358	3	0	G1P1	1	2	1	2	12	2	T1aN0M0	T1a	1	微小乳头状癌	2	2	2
00285898	李芙蓉	23	160	52	20.3125	2	0	G0P0	0	1	0	1	13	2	T1aN1bM0	T1a	1	乳头状癌	1	1	1
222606	尹华	42	167	54.5	19.5418	2	0	G1P1	1	2	1	2	14	2	T2N0M0	T2	1	乳头状癌	2	2	2
00286015	张渺	26	160	45	17.5781	1	0	G1P1	1	2	1	2	12	2	T1aN1aM0	T1a	1	乳头状癌	1	1	2
00286074	刘艾菲	26	164	59	21.9363	2	0	G0P0	0	1	0	1	12	2	T1bN1bM0	T1b	1	乳头状癌	1	1	1
00285347	敬一玲	19	160	82	32.0312	4	0	G0P0	0	1	0	1	10	1	T1aN0M0	T1a	1	微小乳头状癌	2	2	2
286607	于歆莹	35	158	59	23.634	2	0	G3P1	3	3	1	2	12	2	T1aN1aM0	T1a	1	乳头状癌	1	1	2
00286200	王海露	27	147	48	22.213	2	0	G2P2	2	2	2	2	13	2	T2N1bM0	T2	1	乳头状癌	1	1	1
00286743	李瑶	23	160	71	27.7344	3	0	G0P0	0	1	0	1	14	2	T1bN1aM0	T1b	1	乳头状癌	1	1	2
00286724	谢佳玲	27	161	46	17.7462	1	0	G1P1	1	2	1	2	13	2	T1bN1bM0	T1b	1	乳头状癌	1	1	1
00286393	陈畅	26	161	57.5	22.1828	2	0	G1P1	1	2	1	2	13	2	T1aN0M0	T1a	1	乳头状癌	2	2	2
00286944	李盼	27	161	65	25.0762	3	0	G1P1	1	2	1	2	14	2	T3N0M0	T3	1	乳头状癌	2	2	2
285782	付昌菊	54	156	63	25.8876	3	0	G2P2	2	2	2	2	16	3	T1aN0M0	T1a	1	乳头状癌	2	2	2
00287132	马琳涵	26	160	56	21.875	2	0	G0P0	0	1	0	1	15	3	T1aN1aM0	T1a	1	乳头状癌	1	1	2
286576	郭春艳	40	154	57	24.0344	3	0	G1P1	1	2	1	2	13	2	T1aN1aM0	T1a	1	乳头状癌	1	1	2
287512	黄萍	46	158	54	21.6311	2	0	G1P1	1	2	1	2	13	2	T1aN1aM0	T1a	1	乳头状癌	1	1	2
00287409	江南	28	172	69	23.3234	2	0	G0P0	0	1	0	1	12	2	T1aN1aM0	T1a	1	乳头状癌	1	1	2
00287410	郑春兰	25	164	53	19.7055	2	0	G0P0	0	1	0	1	13	2	T1aN1bM0	T1a	1	乳头状癌	1	1	1
287542	罗小霞	49	155	55	22.8928	2	0	G1P1	1	2	1	2	13	2	T1aN1aM0	T1a	1	乳头状癌	1	1	2
00287478	汪梅	26	160	55	21.4844	2	0	G0P0	0	1	0	1	13	2	T1bN1aM0	T1b	1	乳头状癌	1	1	2
00287479	丁月友	27	160	50	19.5312	2	0	G1P1	1	2	1	2	12	2	T2N1bM0	T2	1	乳头状癌	1	1	1
00286696	闵倩	28	168	52.5	18.6012	2	0	G1P1	1	2	1	2	12	2	T3N1bM0	T3	1	乳头状癌	1	1	1
288501	陈佳莉	28	155	44	18.3143	1	0	G0P0	0	1	0	1	12	2	T1aN1aM0	T1a	1	乳头状癌	1	1	2
00287872	刘诗语	21	163	53.5	20.1362	2	0	G0P0	0	1	0	1	13	2	T1aN1bM0	T1a	1	乳头状癌	1	1	1
00285986	王国玉	30	160	53	20.7031	2	0	G0P0	0	1	0	1	12	2	T3N1aM0	T3	1	乳头状癌	1	1	2
288242	陈斌	39	158	56	22.4323	2	0	G1P1	1	2	1	2	15	3	T1aN0M0	T1a	1	乳头状癌	2	2	2
00288273	李茂霞	29	159	48	18.9866	2	0	G0P0	0	1	0	1	14	2	T1aN0M0	T1a	1	乳头状癌	2	2	2
00288182	刘珊	22	145	44	20.9275	2	0	G0P0	0	1	0	1	14	2	T1aN1aM0	T1a	1	乳头状癌	1	1	2
00288318	熊莉萍	27	162	60	22.8624	2	0	G2P1	2	2	1	2	11	1	T1aN1aM0	T1a	1	乳头状癌	1	1	2
00288321	高杨	29	165	84	30.854	4	0	G0P0	0	1	0	1	12	2	T3N1bM0	T3	1	乳头状癌	1	1	1
288377	李丽	37	159	47	18.591	2	0	G1P1	1	2	1	2	13	2	T1bN0M0	T1b	1	乳头状癌	2	2	2
00288713	张小香	22	157	56	22.719	2	0	G0P0	0	1	0	1	12	2	T1aN0M0	T1a	1	乳头状癌	2	2	2
00289262	王西	28	160	52.5	20.5078	2	0	G4P2	4	3	2	2	12	2	T2N1aM0	T2	1	乳头状癌	1	1	2
00289312	李娟	29	155	57.5	23.9334	2	0	G0P0	0	1	0	1	14	2	T1aN1aM0	T1a	1	乳头状癌	1	1	2
289397	王凌	34	161	54	20.8325	2	0	G2P1	2	2	1	2	14	2	T1aN1aM0	T1a	1	乳头状癌	1	1	2
289640	朱海仑	45	160	62	24.2188	3	0	G1P1	1	2	1	2	12	2	T3N1bM0	T3	1	乳头状癌	1	1	1
289763	何曲	47	150	54	24	3	0	G2P2	2	2	2	2	14	2	T1aN1bM0	T1a	1	乳头状癌	1	1	1
00289755	吴凤	29	152	46	19.91	2	0	G1P1	1	2	1	2	13	2	T1aN0M0	T1a	1	乳头状癌	2	2	2
00289883	李东琼	21	160	70	27.3438	3	0	G0P0	0	1	0	1	12	2	T1aN1aM0	T1a	1	乳头状癌	1	1	2
00289878	王文花	29	155	52	21.6441	2	0	G2P1	2	2	1	2	11	1	T1bN1aM0	T1b	1	乳头状癌	1	1	2
271460	郭卫	45	158	62	24.8358	3	0	1P1	1	2	1	2	12	2	T1aN0M0	T1a	1	乳头状癌	2	2	2
00289620	彭伶俐	26	162	55	20.9572	2	0	G0P0	0	1	0	1	13	2	T1bN0M0	T1b	1	乳头状癌伴甲状腺内转移	2	2	2
00289921	刘飞飞	28	158	58	23.2335	2	0	G1P1	1	2	1	2	14	2	T3N1bM0	T3	1	乳头状癌	1	1	1
00289675	马丽娟	20	165	57	20.9366	2	0	G0P0	0	1	0	1	13	2	T1bN1aM0	T1b	1	乳头状癌	1	1	2
290692	刘菊珍	61	155	56	23.3091	2	0	G1P1	1	2	1	2	12	2	T1aN1bM0	T1a	2	乳头状癌	1	1	1
00290725	何天凤	30	152	50	21.6413	2	0	G1P1	1	2	1	2	14	2	T3N1aM0	T3	1	乳头状癌	1	1	2
290872	王中贤	42	160	56	21.875	2	0	G1P1	1	2	1	2	12	2	T1aN0M0	T1a	1	乳头状癌	2	2	2
290736	刘芭	39	160	79	30.8594	4	0	G1P1	1	2	1	2	13	2	T1aN1aM0	T1a	1	乳头状癌	1	1	2
290819	谢红	38	171	55	18.8092	2	0	G2P2	2	2	2	2	12	2	T1bN1aM0	T1b	1	乳头状癌	1	1	2
00291169	李桃	27	158	55	22.0317	2	0	G1P1	1	2	1	2	13	2	T1aN0M0	T1a	1	乳头状癌	2	2	2
00291388	吴丽	26	155	51	21.2279	2	0	G0P0	0	1	0	1	12	2	T1bN1aM0	T1b	1	乳头状癌	1	1	2
00292157	杨柳	28	155	52	21.6441	2	0	G1P1	1	2	1	2	13	2	T1aN0M0	T1a	1	乳头状癌	2	2	2
00288131	熊萍	26	163	52	19.5717	2	0	G1P1	1	2	1	2	13	2	T1bN1bM0	T1b	1	乳头状癌	1	1	1
00292771	王淑琼	30	154	50	21.0828	2	0	G3P1	3	3	1	2	12	2	T1bN1bM0	T1b	1	乳头状癌	1	1	1
292968	罗来艳	49	160	62.5	24.4141	3	0	G1P1	1	2	1	2	15	3	T1bN0M0	T1b	1	乳头状癌	2	2	2
292838	姚菊	49	150	56	24.8889	3	0	G2P2	2	2	2	2	17	3	T1aN0M0	T1a	1	乳头状癌	2	2	2
293178	易凤莲	44	150	54	24	3	0	G1P1	1	2	1	2	12	2	T1aN1aM0	T1a	1	乳头状癌	1	1	2
00293568	高姝	29	155	52	21.6441	2	0	G1P1	1	2	1	2	12	2	T2N1bM0	T2	1	乳头状癌	1	1	1
00292863	何德平	28	150	47	20.8889	2	0	G5P2	5	4	2	2	12	2	T4aN1bM0	T4a	1	乳头状癌	1	1	1
291526	张群文	50	158	63.5	25.4366	3	0	G1P1	1	2	1	2	14	2	T1aN0M0	T1a	1	乳头状癌	2	2	2
00293791	何玉娇	30	170	59	20.4152	2	0	G0P0	0	1	0	1	13	2	T3N1aM0	T3	1	乳头状癌	1	1	2
00293976	伍瑞	24	162	55	20.9572	2	0	G1P1	1	2	1	2	14	2	T1aN1aM0	T1a	1	乳头状癌	1	1	2
294484	吴玉梅	37	150	50	22.2222	2	0	G2P2	2	2	2	2	13	2	T1aN1bM0	T1a	1	乳头状癌	1	1	1
00294107	冷彩铃	20	160	60	23.4375	2	0	G0P0	0	1	0	1	14	2	T2N1bM0	T2	1	乳头状癌	1	1	1
00294179	李茜	30	168	67	23.7387	2	父亲食管癌，祖父肝癌，外祖母口腔癌	G0P0	0	1	0	1	14	2	T3N0M0	T3	1	乳头状癌	2	2	2
294351	钟德玉	50	155	62	25.8065	3	0	G1P1	1	2	1	2	16	3	T1aN0M0	T1a	1	乳头状癌	2	2	2
294839	文华	43	150	62	27.5556	3	0	G1P1	1	2	1	2	12	2	T1aN1aM0	T1a	1	乳头状癌	1	1	2
295233	方剑平	43	158	62	24.8358	3	0	G1P1	1	2	1	2	12	2	T1aN0M0	T1a	1	乳头状癌	2	2	2
295376	彭忠凤	39	160	55	21.4844	2	0	G1P1	1	2	1	2	13	2	T1aN0M0	T1a	1	乳头状癌	2	2	2
00295413	符欣洁	30	163	53	19.9481	2	0	G0P0	0	1	0	1	14	2	T1aN0M0	T1a	1	乳头状癌	2	2	2
00295629	张静	30	160	51	19.9219	2	0	G1P1	1	2	1	2	12	2	T1aN1aM0	T1a	1	乳头状癌	1	1	2
295572	刘振芳	48	160	59	23.0469	2	0	G1P1	1	2	1	2	14	2	T3N0M0	T3	1	乳头状癌	2	2	2
295734	胡温术	42	155	52	21.6441	2	0	G2P2	2	2	2	2	16	3	T1aN0M0	T1a	1	乳头状癌	2	2	2
00295863	秦琳	22	160	55	21.4844	2	0	G1P1	1	2	1	2	14	2	T1aN0M0	T1a	1	乳头状癌	2	2	2
00296006	杨永美	21	157	70	28.3987	4	0	G1P1	1	2	1	2	13	2	T1bN0M0	T1b	1	乳头状癌	2	2	2
295838	罗春燕	44	170	65	22.4913	2	0	G1P1	1	2	1	2	15	3	T2N1aM0	T2	1	乳头状癌	1	1	2
295843	袁月	42	168	63	22.3214	2	0	G1P1	1	2	1	2	12	2	T1aN0M0	T1a	1	乳头状癌	2	2	2
296187	叶玉先	60	145	43	20.4518	2	0	G1P1	1	2	1	2	15	3	T1aN1aM0	T1a	2	乳头状癌	1	1	2
00296237	徐丽娟	27	158	57	22.8329	2	0	G1P1	1	2	1	2	14	2	T1aN1aM0	T1a	1	乳头状癌	1	1	2
00296307	邓梦梅	30	163	54	20.3244	2	母亲患有乙肝	G0P0	0	1	0	1	14	2	T1aN1aM0	T1a	1	乳头状癌	1	1	2
296449	梁茵	35	156	64	26.2985	3		G1P1	1	2	1	2	14	2	T4N1bM0	T4	1	乳头状癌	1	1	1
296513	傅玉英	50	155	45	18.7305	2	0	G7P1	7	4	1	2	16	3	T2N1bM0	T2	1	乳头状癌	1	1	1
296605	高菊花	60	151	52	22.806	2	0	G2P2	2	2	2	2	15	3	T1aN0M0	T1a	1	乳头状癌	2	2	2
00296624	孙静	27	172	61	20.6193	2	0	G1P1	1	2	1	2	14	2	T1aN0M0	T1a	1	乳头状癌	2	2	2
00296692	王盈	29	160	51.5	20.1172	2	父亲患有胃癌	G2P0	2	2	0	1	14	2	T1bN0M0	T1b	1	乳头状癌	2	2	2
296713	陈力	46	160	61.5	24.0234	3	0	G1P1	1	2	1	2	13	2	T1bN1aM0	T1b	1	乳头状癌	1	1	2
296433	何华	53	164	57	21.1927	2	0	G1P1	1	2	1	2	15	3	T3N0M0	T3	1	乳头状癌	2	2	2
297120	王艳美	39	160	56	21.875	2	0	G1P1	1	2	1	2	12	2	T1aN0M0	T1a	1	乳头状癌	2	2	2
297287	周晓婧	32	167	72	25.8166	3	0	G1P1	1	2	1	2	14	2	T1aN1aM0	T1a	1	乳头状癌	1	1	2
297362	范春琼	46	158	65	26.0375	3	0	G1P1	1	2	1	2	14	2	T1aN0M0	T1a	1	乳头状癌	2	2	2
00297154	王静	30	162	50	19.052	2	0	G0P0	0	1	0	1	12	2	T1aN1aM0	T1a	1	乳头状癌	1	1	2
297482	何丹	35	164	73	27.1416	3	0	G2P2	2	2	2	2	13	2	T1aN1aM0	T1a	1	乳头状癌	1	1	2
297525	雷义芳	66	154	55	23.1911	2	0	G1P1	1	2	1	2	12	2	T1aN0M0	T1a	1	乳头状癌	2	2	2
296799	吴明玉	42	150	47	20.8889	2	0	G1P1	1	2	1	2	16	3	T1aN0M0	T1a	1	乳头状癌	2	2	2
297961	曾庆玉	59	158	67.5	27.0389	3	0	G1P1	1	2	1	2	17	3	T1aN0M0	T1a	1	乳头状癌	2	2	2
300754	汪永兰	51	155	52.5	21.8522	2	0	G1P1	1	2	1	2	14	2	T1aN0M0	T1a	1	乳头状癌	2	2	2
00297668	廖玮佳	29	158	64	25.6369	3	0	G1P1	1	2	1	2	13	2	T1aN1aM0	T1a	1	乳头状癌	1	1	2
298001	郑红	55	170	82	28.3737	4	0	G1P1	1	2	1	2	13	2	T1bN1aM0	T1b	2	乳头状癌	1	1	2
297674	阿衣子斤	23	153	43	18.369	1	0	G1P1	1	2	1	2	14	2	T1bN1aM0	T1b	1	乳头状癌	1	1	2
297863	邓开连	46	160	60.5	23.6328	2	0	G2P2	2	2	2	2	17	3	T1aN0M0	T1a	1	乳头状癌	2	2	2
00297938	陈春林	30	164	54	20.0773	2	0	G1P1	1	2	1	2	15	3	T4aN1aM0	T4a	1	乳头状癌	1	1	2
297947	张世秀	47	156	56.5	23.2166	2	0	G1P1	1	2	1	2	13	2	T1aN0M0	T1a	1	乳头状癌	2	2	2
298730	蔡富玲	53	154	49	20.6612	2	0	G3P1	3	3	1	2	15	3	T1aN0M0	T1a	1	乳头状癌	2	2	2
298708	蔡荣华	41	168	73	25.8645	3	0	G2P2	2	2	2	2	15	3	T1aN0M0	T1a	1	乳头状癌	2	2	2
298308	杨春燕	32	162	61	23.2434	2	0	G2P2	2	2	2	2	14	2	T1aN0M0	T1a	1	乳头状癌	2	2	2
298733	刘坤宁	52	160	81	31.6406	4	0	G1P1	1	2	1	2	14	2	T1aN0M0	T1a	1	乳头状癌	2	2	2
00298285	袁菁梅	23	160	56	21.875	2	0	G0P0	0	1	0	1	14	2	T1aN1aM0	T1a	1	微小乳头状癌	1	1	2
00298752	方丹	27	158	58	23.2335	2	0	G1P1	1	2	1	2	13	2	T2N1bM0	T2	1	乳头状癌	1	1	1
298751	黄芳	44	160	51	19.9219	2	0	G1P1	1	2	1	2	14	2	T3N1 b M0	T31	1	乳头状癌	1	1	1
298389	陈君兰	38	163	72.5	27.2874	3	0	G1P1	1	2	1	2	14	2	T1aN1aM0	T1a	1	乳头状癌	1	1	2
298840	张文清	48	161	54	20.8325	2	0	G1P1	1	2	1	2	14	2	T1bN0M0	T1b	1	乳头状癌	2	2	2
298832	向琳	31	167	53.5	19.1832	2	0	G0P0	0	1	0	1	13	2	T1bN1bM0	T1b	1	乳头状癌	1	1	1
00298838	朱丹	28	164	60	22.3081	2	0	G1P1	1	2	1	2	14	2	T1bN1bM0	T1b	1	乳头状癌	1	1	1
00299044	代丽	30	154	50	21.0828	2	0	G1P1	1	2	1	2	14	2	T1aN0M0	T1a	1	乳头状癌	2	2	2
299530	薛山	32	171	53	18.1252	1	0	G0P0	0	1	0	1	13	2	T1aN0M0	T1a	1	乳头状癌	2	2	2
00299664	冯静红	29	160	61	23.8281	2	0	G0P0	0	1	0	1	13	2	T1aN1aM0	T1a	1	乳头状癌	1	1	2
299273	朱利华	40	162	60	22.8624	2	0	G1P1	1	2	1	2	13	2	T4N1aM0	T4	1	乳头状癌	1	1	2
00299237	字银葵	24	162	50	19.052	2	0	G1P1	1	2	1	2	14	2	T1bN1bM0	T1b	1	乳头状癌	1	1	1
299466	王祉颖	32	163	53	19.9481	2	0	G2P2	2	2	2	2	15	3	T1aN1aM0	T1a	1	乳头状癌	1	1	2
00299388	倪柳	21	161	46	17.7462	1	0	G2P1	2	2	1	2	15	3	T2N1bM0	T2	1	乳头状癌	1	1	1
298890	唐知会	52	158	53	21.2306	2	0	G2P2	2	2	2	2	15	3	T1aN0M0	T1a	1	乳头状癌	2	2	2
00299734	梁燕	27	159	53	20.9644	2	0	G0P0	0	1	0	1	15	3	T1bN1aM0	T1b	1	乳头状癌	1	1	2
298060	高嫄	32	169	60	21.0077	2	0	G1P1	1	2	1	2	14	2	T1bN1aM0	T1b	1	乳头状癌	1	1	2
299558	赵琼辉	46	153	66.5	28.4079	4	0	G1P1	1	2	1	2	13	2	T1aN1aM0	T1a	1	乳头状癌	1	1	2
299948	周丽莎	34	149	45	20.2694	2	0	G1P1	1	2	1	2	14	2	T1bN1aM0	T1b	1	乳头状癌	1	1	2
00299586	唐萍	18	160	51.5	20.1172	2	0	G0P0	0	1	0	1	13	2	T1aN1bM0	T1a	1	乳头状癌	1	1	1
00300355	罗雪	25	160	46	17.9688	1	父亲患胃癌，祖母患肺癌	G0P0	0	1	0	1	13	2	T1aN0M0	T1a	1	微小乳头状癌	2	2	2
00300151	方芳	27	165	70	25.7117	3	0	G2P1	2	2	1	2	12	2	T1aN1aM0	T1a	1	乳头状癌	1	1	2
00300738	肖璐	25	160	48	18.75	2	0	G0P0	0	1	0	1	12	2	T1aN0M0	T1a	1	乳头状癌	2	2	2
253129	钟敏华*	51	156	64	26.2985	3	0	G1P1	1	2	1	2	13	2	T1aN0M0	T1a	1	乳头状癌	2	2	2
00300866	廖晴	30	160	53.5	20.8984	2	姨姨患有乳腺癌	G1P1	1	2	1	2	14	2	T1aN0M0	T1a	1	乳头状癌	2	2	2
00300954	周小红	23	162	54	20.5761	2	0	G1P1	1	2	1	2	16	3	T1aN1aM0	T1a	1	乳头状癌	1	1	2
00301124	张娅	30	158	66	26.4381	3	0	G0P0	0	1	0	1	10	1	T1aN0M0	T1a	1	乳头状癌	2	2	2
00301298	田丹	24	165	58	21.3039	2	0	G0P0	0	1	0	1	14	2	T1bN0M0	T1b	1	乳头状癌	2	2	2
00301428	张茂頔	24	160	50	19.5312	2	0	G0P0	0	1	0	1	12	2	T1aN1aM0	T1a	1	乳头状癌	1	1	2
00301231	包诗琦	24	162	51	19.433	2	0	G0P0	0	1	0	1	12	2	T1aN1bM0	T1a	1	乳头状癌	1	1	1
00301236	杨璐荧	24	163	76	28.6048	4	0	G0P0	0	1	0	1	13	2	T1bN1aM0	T1b	1	乳头状癌	1	1	2
00301334	高思	25	170	61	21.1073	2	0	G0P0	0	1	0	1	14	2	T2N1bM0	T2	1	乳头状癌	1	1	1
249143	刘国英	61	155	50	20.8117	2	父亲脑溢血，母亲高血压	G1P1	1	2	1	2	15	3	T4N0M0	T4	3	乳头状癌	2	2	2
00301018	王钰	30	158	51.5	20.6297	2	0	G3P1	3	3	1	2	13	2	T1aN1aM0	T1a	1	乳头状癌	1	1	2
301559	赵颖	38	162	51.5	19.6235	2	0	G1P1	1	2	1	2	13	2	T1aN1aM0	T1a	1	乳头状癌	1	1	2
301380	丁玲	40	160	61	23.8281	2	0	G2P2	2	2	2	2	14	2	T1aN0M0	T1a	1	乳头状癌	2	2	2
00301379	左君乐	26	161	53	20.4467	2	0	G0P0	0	1	0	1	11	1	T1aN0M0	T1a	1	微小乳头状癌	2	2	2
302256	刘和容	42	154	62	26.1427	3	0	G1P1	1	2	1	2	13	2	T1aN1aM0	T1a	1	乳头状癌	1	1	2
00302072	唐时	27	163	50	18.8189	2	0	G0P0	0	1	0	1	13	2	T1aN0M0	T1a	1	囊内乳头状癌	2	2	2
00302419	李梦	23	166	66	23.9512	2	0	G0P0	0	1	0	1	14	2	T1bN0M0	T1b	1	乳头状癌	2	2	2
00302273	吴婷婷	28	158	64	25.6369	3	0	G1P1	1	2	1	2	12	2	T2N1aM0	T2	1	乳头状癌	1	1	2
00310365	贾莎莎	24	158	40.5	16.2234	1	0	G0P0	0	1	0	1	13	2	T1aN1aM0	T1a	1	乳头状癌	1	1	2
00310619	钟佳芯	27	160	47	18.3594	1	0	G0P0	0	1	0	1	14	2	T1aN0M0	T1a	1	乳头状癌	2	2	2
310666	吉科	36	168	55	19.487	2	0	G1P1	1	2	1	2	14	2	T1aN0M0	T1a	1	乳头状癌	2	2	2
00310651	杨建霞	23	165	43.5	15.978	1	0	G0P0	0	1	0	1	14	2	T1aN0M0	T1a	1	乳头状癌	2	2	2
310638	许翠容	64	161	65	25.0762	3	0	G2P2	2	2	2	2	14	2	T1aN1aM0	T1a	2	乳头状癌	1	1	2
00310673	宋家群	26	158	54	21.6311	2	0	G1P1	1	2	1	2	12	2	T4aN1bM0	T4a	1	乳头状癌	1	1	1
00311783	龙月	25	160	51	19.9219	2	0	G1P1	1	2	1	2	14	2	T1aN1aM0	T1a	1	乳头状癌	1	1	2
00310990	周晓芳	26	153	56	23.9224	2	0	G0P0	0	1	0	1	13	2	T1aN0M0	T1a	1	乳头状癌	2	2	2
00311039	李亚男	26	162	45	17.1468	1	0	G0P0	0	1	0	1	14	2	T1aN1aM0	T1a	1	乳头状癌	1	1	2
00300702	罗霞	28	158	57	22.8329	2	0	G1P1	1	2	1	2	14	2	T1bN1bM0	T1b	1	乳头状癌	1	1	1
00311190	罗屈艳	29	164	58	21.5645	2	0	G1P1	1	2	1	2	14	2	T1aN1aM0	T1a	1	乳头状癌	1	1	2
00311446	李诗彤	25	168	62	21.9671	2	0	G0P0	0	1	0	1	14	2	T1aN1aM0	T1a	1	乳头状癌	1	1	2
00311373	牛立阳	23	161	54	20.8325	2	0	G1P1	1	2	1	2	13	2	T1aN1aM0	T1a	1	乳头状癌	1	1	2
00311338	王韬	29	150	45	20	2	0	G0P0	0	1	0	1	12	2	T1bN0M0	T1b	1	乳头状癌	2	2	2
00311761	韩毕霞	22	160	53	20.7031	2	0	G0P0	0	1	0	1	14	2	T1aN1aM0	T1a	1	乳头状癌	1	1	2
00312506	张敏	29	166	55	19.9594	2	0	G1P1	1	2	1	2	12	2	T1aN1aM0	T1a	1	乳头状癌	1	1	2
00312567	阳婷婷	29	150	42	18.6667	2	0	G2P1	2	2	1	2	11	1	T1aN1aM0	T1a	1	乳头状癌	1	1	2
00312688	孔祥洁	29	152	41	17.7458	1	0	G1P1	1	2	1	2	14	2	T1aN1aM0	T1a	1	微小乳头状癌	1	1	2
00312902	邹廷廷	30	160	48	18.75	2	0	G3P1	3	3	1	2	18	3	T1aN1aM0	T1a	1	乳头状癌	1	1	2
00313705	张璐	23	165	60	22.0386	2	0	G1P1	1	2	1	2	13	2	T1aN1aM0	T1a	1	乳头状癌	1	1	2
00313165	刘欣怡	25	160	56	21.875	2	0	G0P0	0	1	0	1	12	2	T1bN1aM0	T1b	1	乳头状癌	1	1	2
00313659	杨华	30	158	49	19.6283	2	0	G5P1	5	4	1	2	15	3	T1bN0M0	T1b	1	乳头状癌	2	2	2
00313800	苟祎	22	158	56.5	22.6326	2	0	G0P0	0	1	0	1	13	2	T1aN1aM0	T1a	1	乳头状癌	1	1	2
00313759	王秋岚	28	167	60	21.5139	2	0	G1P1	1	2	1	2	14	2	T1aN1bM0	T1a	1	乳头状癌	1	1	1
00313958	冯媛	27	150	55	24.4444	3	0	G0P0	0	1	0	1	15	3	T2N1bM0	T2	1	乳头状癌	1	1	1
00315583	姚夕云	24	157	58	23.5304	2	0	G0P0	0	1	0	1	12	2	T3N1 b M0	T3	1	乳头状癌	1	1	1
00314189	张莹莹	23	160	55	21.4844	2	0	G0P0	0	1	0	1	13	2	T2N1bM0	T2	1	乳头状癌	1	1	1
00314478	邹民芳	28	167	63	22.5896	2	0	G1P1	1	2	1	2	14	2	T2N1aM0	T2	1	乳头状癌	1	1	2
00314529	王琪琦	26	177	60	19.1516	2	0	G0P0	0	1	0	1	12	2	T1aN1aM0	T1a	1	微小乳头状癌	1	1	2
00315033	夏可雨	28	157	47	19.0677	2	0	G1P1	1	2	1	2	13	2	T1bN1aM0	T1b	1	乳头状癌	1	1	2
00315179	帅常娟	28	157	46	18.662	2	0	G0P0	0	1	0	1	13	2	T1bN1bM0	T1b	1	乳头状癌	1	1	1
00315263	罗舒心	21	160	54	21.0938	2	0	G0P0	0	1	0	1	13	2	T1aN1aM0	T1a	1	乳头状癌	1	1	2
00315794	刘嘉玲	25	156	56.5	23.2166	2	0	G0P0	0	1	0	1	12	2	T1bN0M0	T1b	1	乳头状癌	2	2	2
00315871	陈诗意	25	172	69	23.3234	2	0	G0P0	0	1	0	1	12	2	T1bN1bM0	T1b	1	乳头状癌	1	1	1
00316077	梁小容	30	165	58	21.3039	2	0	G0P0	0	1	0	1	15	3	T1aN0M0	T1a	1	乳头状癌	2	2	2
00316355	覃方怡	26	162	74	28.1969	4	0	G0P0	0	1	0	1	12	2	T1aN1aM0	T1a	1	乳头状癌	1	1	2
00316294	陈姣	30	160	59.5	23.2422	2	0	G2P2	2	2	2	2	11	1	T1bN0M0	T1b	1	乳头状癌	2	2	2
00316216	周维	27	150	53	23.5556	2	0	G1P1	1	2	1	2	14	2	T3N1bM0	T3	1	乳头状癌	1	1	1
00316403	蒋婷	27	165	55	20.202	2	0	G1P1	1	2	1	2	14	2	T1bN1aM0	T1b	1	分化型甲状腺癌	1	1	2
00316489	武娜	26	156	54	22.1893	2	0	G0P0	0	1	0	1	13	2	T1bN1bM0	T1b	1	乳头状癌	1	1	1
00316974	伍俊璇	29	156	64	26.2985	3	0	G1P1	1	2	1	2	13	2	T1aN0M0	T1a	1	微小乳头状癌	2	2	2
00317884	钟倩	30	162	57	21.7193	2	0	G0P0	0	1	0	1	12	2	T1aN1aM0	T1a	1	乳头状癌	1	1	2
00312688	孔祥洁	30	152	41	17.7458	1	0	G1P1	1	2	1	2	14	2	T1aN0M0	T1a	1	乳头状癌	2	2	2
00318320	叶倩	25	158	44	17.6254	1	0	G0P0	0	1	0	1	13	2	T1aN0M0	T1a	1	乳头状癌	2	2	2
00318485	张利荣	24	142	37.5	18.5975	2	0	G0P0	0	1	0	1	14	2	T1bN1bM0	T1b	1	乳头状癌	1	1	1
00318761	周璇	22	156	63	25.8876	3	0	G1P1	1	2	1	2	12	2	T1bN1aM0	T1b	1	乳头状癌	1	1	2
00318791	郑盛丽	26	160	54	21.0938	2	0	G0P0	0	1	0	1	13	2	T2N1 b M0	T21	1	乳头状癌	1	1	1
00319031	徐玲	26	159	63	24.9199	3	0	G2P2	2	2	2	2	12	2	T1bN0M0	T1b	1	乳头状癌	2	2	2
00319074	李丽	26	160	49	19.1406	2	0	G0P0	0	1	0	1	16	3	T1aN0M0	T1a	1	微小乳头状癌	2	2	2
00319078	刘婷婷	30	160	65	25.3906	3	0	G2P2	2	2	2	2	14	2	T1aN0M0	T1a	1	乳头状癌	2	2	2
00319113	周珍	26	162	55	20.9572	2	0	G0P0	0	1	0	1	12	2	T2N0M0	T2	1	乳头状癌	2	2	2
00318500	马小红	30	165	66	24.2424	3	0	G1P1	1	2	1	2	12	2	T1aN0M0	T1a	1	乳头状癌	2	2	2
00314704	王燕	30	163	61	22.9591	2	0	G2P2	2	2	2	2	13	2	T3N1bM0	T3	1	乳头状癌	1	1	1
00319584	刘丽娇	29	147	51	23.6013	2	母亲患有甲亢	G1P1	1	2	1	2	13	2	T1aN0M0	T1a	1	微小乳头状癌	2	2	2
00319431	刘丫丫	30	165	58	21.3039	2	0	G1P1	1	2	1	2	13	2	T1bN1aM0	T1b	1	乳头状癌	1	1	2
00319554	陈雪娇	30	162	55.5	21.1477	2	0	G2P1	2	2	1	2	12	2	T1bN1bM0	T1b	1	乳头状癌	1	1	1
00319782	张玲琳	28	160	48	18.75	2	0	G0P0	0	1	0	1	12	2	T1aN1bM0	T1a	1	乳头状癌	1	1	1
00320426	刘维	28	164	59	21.9363	2	0	G1P1	1	2	1	2	13	2	T1bN0M0	T1b	1	乳头状癌	2	2	2
00319865	唐亚	25	171	75	25.6489	3	0	G0P0	0	1	0	1	14	2	T3N1 b M0	T31	1	乳头状癌	1	1	1
00320083	罗曼林	30	160	61	23.8281	2	0	G1P1	1	2	1	2	15	3	T1bN1aM0	T1b	1	乳头状癌	1	1	2
00320029	谢可人	24	158	50	20.0288	2	0	G0P0	0	1	0	1	12	2	T1bN1aM0	T1b	1	乳头状癌	1	1	2
00320238	张宇	27	154	50	21.0828	2	0	G0P0	0	1	0	1	13	2	T3N0M0	T3	1	乳头状癌	2	2	2
00320633	陈玲	27	160	53	20.7031	2	0	G0P0	0	1	0	1	13	2	T3N1bM0	T3	1	乳头状癌	1	1	1
00320706	逢雯	25	152	39	16.8802	1	0	G1P1	1	2	1	2	14	2	T3N1bM0	T3	1	乳头状癌	1	1	1
00320867	项园园	24	165	59	21.6713	2	0	G1P1	1	2	1	2	14	2	T1aN1bM0	T1a	1	乳头状癌	1	1	1
00320802	陈姝琦	23	170	78	26.9896	3	0	G0P0	0	1	0	1	12	2	T3N1aM0	T3	1	乳头状癌	1	1	2
00321171	周琳曼	23	163	58	21.83	2	0	G0P0	0	1	0	1	13	2	T1aN0M0	T1a	1	乳头状癌	2	2	2
00321250	毛晔	28	157	46	18.662	2	0	G0P0	0	1	0	1	13	2	T1aN0M0	T1a	1	乳头状癌	2	2	2
00321459	李雨轩	26	158	53	21.2306	2	0	G0P0	0	1	0	1	13	2	T1aN0M0	T1a	1	乳头状癌	2	2	2
00321572	晋云利	27	161	42	16.2031	1	0	G0P0	0	1	0	1	14	2	T1aN0M0	T1a	1	乳头状癌	2	2	2
00321559	陈澄	29	160	50	19.5312	2	0	G1P1	1	2	1	2	14	2	T3N1aM0	T3	1	微小乳头状癌	1	1	2
00322124	朱昕笛	30	165	80	29.3848	4	0	G0P0	0	1	0	1	10	1	T1aN1aM0	T1a	1	乳头状癌	1	1	2
00322023	吴敏	26	162	60	22.8624	2	0	G0P0	0	1	0	1	12	2	T2N0M0	T2	1	乳头状癌	2	2	2
00322329	伟则莫你咱	27	155	53	22.0604	2	0	G0P0	0	1	0	1	14	2	T3N1bM0	T3	1	乳头状癌	1	1	1
00322343	林隽泓	20	165	58	21.3039	2	0	G0P0	0	1	0	1	11	1	T4N1bM0	T4	1	乳头状癌	1	1	1
00322731	龙海梅	30	155	46	19.1467	2	0	G2P2	2	2	2	2	14	2	T4aN1bM0	T4a	1	乳头状癌	1	1	1
00322860	袁翠	24	153	52	22.2137	2	0	G1P1	1	2	1	2	12	2	T2N1aM0	T2	1	乳头状癌	1	1	2
00322792	彭德苹	27	155	47	19.563	2	0	G2P2	2	2	2	2	13	2	T4N1bM0	T4	1	乳头状癌	1	1	1
00322973	唐丹	27	168	87	30.8248	4	0	G0P0	0	1	0	1	13	2	T1aN0M0	T1a	1	乳头状癌	2	2	2
00322965	尹碧英	22	165	55	20.202	2	0	G0P0	0	1	0	1	11	1	T2N1 b M0	T21	1	乳头状癌	1	1	1
00003510	王娟	28	159	45	17.7999	1	0	G0P0	0	1	0	1	14	2	T1aN0M0	T1a	1	乳头状癌	2	2	2
00323985	文莉	26	158	51	20.4294	2	0	G1P1	1	2	1	2	14	2	T3N1 b M0	T31	1	乳头状癌	1	1	1
00324439	杨眉	30	170	67	23.1834	2	0	G0P0	0	1	0	1	16	3	T2N1aM0	T2	1	乳头状癌	1	1	2
00324791	龙瑶	24	158	60	24.0346	3	0	G0P0	0	1	0	1	14	2	T1aN1aM0	T1a	1	乳头状癌	1	1	2
00324774	周佩	28	160	54	21.0938	2	0	G1P0	1	2	0	1	13	2	T3N0M0	T3	1	乳头状癌	2	2	2
00324961	周玉	25	162	49	18.6709	2	0	G0P0	0	1	0	1	14	2	T1aN1bM0	T1a	1	乳头状癌	1	1	1
00324999	钱娜	29	164	57	21.1927	2	0	G1P1	1	2	1	2	12	2	T1bN1aM0	T1b	1	乳头状癌	1	1	2
00324985	李如意	22	163	69	25.9701	3	0	G0P0	0	1	0	1	12	2	T2N0M0	T2	1	乳头状癌	2	2	2
00326026	许婧	29	155	61	25.3902	3	0	G0P0	0	1	0	1	12	2	T1aN1aM0	T1a	1	乳头状癌	1	1	2
00325091	冯蝉	30	160	48	18.75	2	0	G1P1	1	2	1	2	12	2	T3N1aM0	T3	1	乳头状癌	1	1	2
00325364	张晓唯	26	171	57	19.4932	2	0	G0P0	0	1	0	1	12	2	T1aN1aM0	T1a	1	乳头状癌	1	1	2
00325514	赵雪婷	28	156	50	20.5457	2	0	G0P0	0	1	0	1	13	2	T1bN0M0	T1b	1	乳头状癌	2	2	2
00325501	熊芮萱	23	161	60	23.1473	2	0	G0P0	0	1	0	1	13	2	T3N1bM0	T3	1	乳头状癌	1	1	1
00325908	何媛媛	25	157	52	21.0962	2	0	G0P0	0	1	0	1	13	2	T2N1bM0	T2	1	乳头状癌	1	1	1
00326060	孙红	22	160	46	17.9688	1	0	G0P0	0	1	0	1	12	2	T1aN1aM0	T1a	1	乳头状癌	1	1	2
00325793	付燕	30	172	49	16.563	1	0	G1P1	1	2	1	2	13	2	T3N1aM0	T3	1	乳头状癌	1	1	2
00326745	李波	29	165	73	26.8136	3	0	G2P2	2	2	2	2	13	2	T3N0M0	T3	1	乳头状癌	2	2	2
00326971	杨璐	29	158	57	22.8329	2	0	G1P1	1	2	1	2	16	3	T1bN1aM0	T1b	1	乳头状癌	1	1	2
00326889	王洁宇	24	157	50	20.2848	2	0	G0P0	0	1	0	1	12	2	T1aN0M0	T1a	1	微小乳头状癌	2	2	2
0326981	冉雪	26	158	60	24.0346	3	家族中有甲状腺癌患者，大姨患有甲状腺结节	G0P0	0	1	0	1	13	2	T1bN1aM0	T1b	1	乳头状癌	1	1	2
00326998	格玛	28	165	64	23.5078	2	0	G1P1	1	2	1	2	13	2	T1aN0M0	T1a	1	乳头状癌	2	2	2
00326994	张悦	28	160	59	23.0469	2	祖母患有甲状腺结节	G0P0	0	1	0	1	13	2	T2N0M0	T2	1	乳头状癌	2	2	2
00327241	罗寒之	22	158	45	18.026	1	0	G0P0	0	1	0	1	13	2	T1aN1bM0	T1a	1	乳头状癌	1	1	1
00326569	龚春秀	29	158	55	22.0317	2	0	G0P0	0	1	0	1	15	3	T1bN0M0	T1b	1	乳头状癌	2	2	2
00327480	莫兰兰	22	155	57	23.7253	2	0	G0P0	0	1	0	1	14	2	T1bN1aM0	T1b	1	乳头状癌	1	1	2
00327806	李龙梅	29	158	53	21.2306	2	0	G3P2	3	3	2	2	14	2	T2N1aM0	T2	1	乳头状癌	1	1	2
00327448	黄贞榛	27	160	58	22.6562	2	爷爷患有肺癌	G1P1	1	2	1	2	14	2	T2N1bM0	T2	1	乳头状癌	1	1	1
00327737	巫丹	30	158	62	24.8358	3	0	G1P1	1	2	1	2	13	2	T1aN1aM0	T1a	1	乳头状癌	1	1	2
00328311	张玉娟	23	161	62	23.9188	2	0	G0P0	0	1	0	1	12	2	T1bN1aM0	T1b	1	乳头状癌	1	1	2
00328860	周晨曦	28	163	61	22.9591	2	0	G2P2	2	2	2	2	13	2	T3N1bM0	T3	1	乳头状癌	1	1	1
00328867	冷雨婷	27	168	52	18.424	1	0	G0P0	0	1	0	1	12	2	T1bN1bM0	T1b	1	乳头状癌	1	1	1
00329099	唐秀容	28	165	65	23.8751	2	0	G1P1	1	2	1	2	16	3	T1aN1bM0	T1a	1	乳头状癌	1	1	1
00329156	唐丹	29	155	53	22.0604	2	0	G1P1	1	2	1	2	13	2	T3N1 a M0	T31	1	乳头状癌	1	1	2
329185	彭艳	35	153	57	24.3496	3	0	G1P1	1	2	1	2	12	2	T1bN1bM0	T1b	1	乳头状癌	1	1	1
00329302	张莉	24	158	51	20.4294	2	0	G0P0	0	1	0	1	12	2	T1aN1aM0	T1a	1	乳头状癌	1	1	2
00329371	罗飘	24	158	49	19.6283	2	0	G1P1	1	2	1	2	14	2	T1bN1aM0	T1b	1	乳头状癌	1	1	2
00329639	陆叶	27	162	50	19.052	2	0	G0P0	0	1	0	1	13	2	T1bN0M0	T1b	1	乳头状癌	2	2	2
00330353	罗雅莉	27	158	52	20.83	2	0	G0P0	0	1	0	1	13	2	T1aN1bM0	T1a	1	乳头状癌	1	1	1
00329903	马晓丽	27	163	51	19.1953	2	0	G0P0	0	1	0	1	15	3	T1aN1aM0	T1a	1	微小乳头状癌	1	1	2
00329913	杨丹	30	148	61	27.8488	3	奶奶患有子宫癌	G0P0	0	1	0	1	12	2	T2N1aM0	T2	1	乳头状癌	1	1	2
00330082	安娇	25	171	51	17.4413	1	0	G2P2	2	2	2	2	13	2	T1bN1bM0	T1b	1	乳头状癌	1	1	1
00324622	魏晓馨	26	150	39	17.3333	1	0	G3P1	3	3	1	2	14	2	T1aN0M0	T1a	1	乳头状癌	2	2	2
00330485	万顺萍	26	158	49	19.6283	2	0	G0P0	0	1	0	1	13	2	T3N1aM0	T3	1	乳头状癌	1	1	2
00330529	余仕丽	29	175	71	23.1837	2	0	G1P1	1	2	1	2	13	2	T3N1bM0	T3	1	乳头状癌	1	1	1
00330913	尤沥娟	30	159	59	23.3377	2	0	G2P1	2	2	1	2	13	2	T1bN1aM0	T1b	1	乳头状癌	1	1	2
00330757	刘迦文	26	169	58	20.3074	2	0	G0P0	0	1	0	1	12	2	T1bN1aM0	T1b	1	乳头状癌	1	1	2
00329433	杨静	28	163	69	25.9701	3	0	G1P1	1	2	1	2	12	2	T1bN1bM0	T1b	1	乳头状癌	1	1	1
00331388	宋文佳	30	165	54	19.8347	2	0	G2P1	2	2	1	2	14	2	T3N1aM0	T3	1	乳头状癌	1	1	2
00331599	张梦雨	26	160	57	22.2656	2	0	G0P0	0	1	0	1	13	2	T1aN1aM0	T1a	1	乳头状癌	1	1	2
00331573	胡露青	30	167	59	21.1553	2	0	G1P1	1	2	1	2	13	2	T1bN0M0	T1b	1	乳头状癌	2	2	2
00331777	淳巧燕	29	155	54	22.4766	2	0	G1P0	1	2	0	1	12	2	T1aN1aM0	T1a	1	乳头状癌	1	1	2
00331710	彭丹秋	21	162	48	18.2899	1	0	G0P0	0	1	0	1	13	2	T1bN0M0	T1b	1	乳头状癌	2	2	2
00331917	屈晏	26	159	61	24.1288	3	0	G1P1	1	2	1	2	13	2	T1aN1aM0	T1a	1	乳头状癌	1	1	2
00332086	彭娟	29	155	48	19.9792	2	父亲患有甲状腺结节，奶奶患有甲亢	G0P0	0	1	0	1	14	2	T1bN1aM0	T1b	1	乳头状癌	1	1	2
00332193	陈皓熙	23	162	56	21.3382	2	0	G0P0	0	1	0	1	13	2	T1aN1aM0	T1a	1	乳头状癌	1	1	2
00332355	刘娟	30	164	56	20.8209	2	爷爷患有肺癌	G5P1	5	4	1	2	13	2	T1aN1bM0	T1a	1	乳头状癌	1	1	1
00332443	刘慧	26	158	50	20.0288	2	0	G4P1	4	3	1	2	14	2	T1aN0M0	T1a	1	乳头状癌	2	2	2
00332812	张碧轩	24	155	54	22.4766	2	0	G0P0	0	1	0	1	15	3	T1bN1bM0	T1b	1	乳头状癌	1	1	1
00333064	李秀英	30	158	55	22.0317	2	0	G1P1	1	2	1	2	12	2	T1aN0M0	T1a	1	乳头状癌	2	2	2
00333049	王莉	24	160	73	28.5156	4	0	G0P0	0	1	0	1	10	1	T2N0M0	T2	1	乳头状癌	2	2	2
00332224	钟沛育	30	152	58	25.1039	3	0	G2P2	2	2	2	2	14	2	T3N1bM0	T3	1	乳头状癌	1	1	1
00333562	郭琳玉	23	157	56	22.719	2	0	G0P0	0	1	0	1	14	2	T2N1aM0	T2	1	乳头状癌	1	1	2
00333616	杨伊	28	154	43	18.1312	1	0	G2P1	2	2	1	2	14	2	T1aN0M0	T1a	1	乳头状癌	2	2	2
00333730	张瑞	23	156	53	21.7784	2	0	G0P0	0	1	0	1	14	2	T1aN1aM0	T1a	1	乳头状癌	1	1	2
00333746	李晓芳	19	165	54	19.8347	2	0	G0P0	0	1	0	1	12	2	T3N1bM0	T3	1	乳头状癌	1	1	1
00333619	蒋莹	28	157	49	19.8791	2	0	G0P0	0	1	0	1	12	2	TxN1bM0	Tx	1	乳头状癌	1	1	1
00333538	杨斌清	29	158	44	17.6254	1	0	G0P0	0	1	0	1	14	2	T1bN1bM0	T1b	1	乳头状癌	1	1	1
00334416	余俞乐	26	165	52	19.1001	2	0	G0P0	0	1	0	1	12	2	T3N1bM0	T3	1	乳头状癌	1	1	1
00334457	刘丽君	29	151	48	21.0517	2	0	G3P2	3	3	2	2	14	2	T1aN1aM0	T1a	1	乳头状癌	1	1	2
00334643	桂小倩	22	154	45	18.9745	2	0	G1P1	1	2	1	2	12	2	T1aN1bM0	T1a	1	乳头状癌	1	1	1
00334571	李婉玲	27	166	54	19.5965	2	0	G0P0	0	1	0	1	11	1	T4N1bM0	T4	1	乳头状癌	1	1	1
00334807	黄欣	28	166	54	19.5965	2	0	G0P0	0	1	0	1	14	2	TxN1bM0	Tx	1	乳头状癌	1	1	1
00334876	张铭晏	20	151	55	24.1217	3	0	G0P0	0	1	0	1	11	1	T1aN1aM0	T1a	1	乳头状癌	1	1	2
00332665	李泓潇	20	165	68	24.977	3	0	G0P0	0	1	0	1	12	2	T3N0M0	T3	1	微小浸润性滤泡癌	2	2	2
00334945	朱佑超	30	158	54	21.6311	2	0	G0P0	0	1	0	1	13	2	T3N1aM0	T3	1	乳头状癌	1	1	2
00335126	曾麟	25	163	54	20.3244	2	奶奶患有肺癌	G0P0	0	1	0	1	13	2	T1aN1aM0	T1a	1	乳头状癌	1	1	2
00335177	邓洪玲	26	160	49	19.1406	2	0	G0P0	0	1	0	1	14	2	T3N1aM0	T3	1	乳头状癌	1	1	2
00335213	胡兴华	20	160	56	21.875	2	0	G1P1	1	2	1	2	12	2	T3N1aM0	T3	1	乳头状癌	1	1	2
00311947	管倩	26	155	42	17.4818	1	0	G0P0	0	1	0	1	12	2	TxN1bM0	Tx	1	乳头状癌	1	1	1
00335338	成思思	25	165	56	20.5693	2	0	G2P1	2	2	1	2	13	2	T1aN0M0	T1a	1	乳头状癌	2	2	2
00335491	侯杰琼	24	157	43	17.4449	1	0	G2P1	2	2	1	2	14	2	T1aN0M0	T1a	1	乳头状癌	2	2	2
00335570	赵婷	28	170	80	27.6817	3	父亲患有高血压、糖尿病	G2P1	2	2	1	2	13	2	T1aN1aM0	T1a	1	乳头状癌	1	1	2
00334897	任君梅	30	163	71	26.7229	3	0	G3P2	3	3	2	2	12	2	T3N1bM0	T3	1	乳头状癌	1	1	1
00348011	罗聘婷	29	159	57	22.5466	2	0	G1P1	1	2	1	2	13	2	T1aN1bM0	T1a	1	乳头状癌	1	1	1
00348024	徐夕	27	165	54.5	20.0184	2	0	G2P2	2	2	2	2	12	2	T1aN1bM0	T1a	1	乳头状癌	1	1	1
00348196	宋绍荣	25	153	56	23.9224	2	0	G2P2	2	2	2	2	14	2	T1aN0M0	T1a	1	乳头状癌	2	2	2
00348198	彭凡	26	163	63	23.7118	2	0	G0P0	0	1	0	1	12	2	T1bN1aM0	T1b	1	乳头状癌累犯被膜，以滤泡亚型为主，灶性脉管内�	1	1	2
00348439	毛心蕾	29	163	60	22.5827	2	0	G2P2	2	2	2	2	12	2	T1aN0M0	T1a	1	乳头状癌	2	2	2
00348632	刘俊灵	25	158	69	27.6398	3	0	G1P1	1	2	1	2	12	2	T1bN1bM0	T1b	1	滤泡型乳头状癌	1	1	1
00348665	余琴	30	165	69	25.3444	3	0	G4P2	4	3	2	2	12	2	T3N1bM0	T3	1	乳头状癌	1	1	1
00348880	赵冬梅	30	163	50	18.8189	2	母亲患有高血压	G1P1	1	2	1	2	14	2	T1aN1aM0	T1a	1	乳头状癌	1	1	2
00349349	邱俊瑭	23	157	44	17.8506	1	0	G0P0	0	1	0	1	14	2	T1aN1aM0	T1a	1	乳头状癌	1	1	2
00349542	李青	24	163	62	23.3355	2	0	G0P0	0	1	0	1	12	2	T1bN1aM0	T1b	1	乳头状癌	1	1	2
00349856	宋唯	29	163	57.5	21.6418	2	父亲患有糖尿病	G0P0	0	1	0	1	13	2	T1aN0M0	T1a	1	乳头状癌	2	2	2
00349755	冷琪	20	156	46.5	19.1075	2	0	G0P0	0	1	0	1	12	2	T1aN1bM0	T1a	1	乳头状癌（弥漫硬化性）	1	1	1
00349978	王银	27	166	60	21.7738	2	0	G1P1	1	2	1	2	12	2	T3N1bM0	T3	1	乳头状癌	1	1	1
00350142	万雪珍	27	165	67	24.6097	3	0	G0P0	0	1	0	1	14	2	T1aN0M0	T1a	1	乳头状癌	2	2	2
00350124	宁娟	29	158	55	22.0317	2	0	G0P0	0	1	0	1	13	2	T1aN0M0	T1a	1	乳头状癌	2	2	2
00350191	赵占雄	26	158	52.5	21.0303	2	0	G0P0	0	1	0	1	12	2	T1aN1bM0	T1a	1	乳头状癌	1	1	1
00349492	周萍婷	24	159	54.5	21.5577	2	0	G2P2	2	2	2	2	14	2	T1bN1bM0	T1b	1	乳头状癌	1	1	1
00350736	秦弦	23	160	43	16.7969	1	0	G0P0	0	1	0	1	14	2	T1aN1aM0	T1a	1	乳头状癌	1	1	2
00350639	丁志杨	23	156	62	25.4767	3	祖父患肺癌	G0P0	0	1	0	1	12	2	T1aN1aM0	T1a	1	乳头状癌	1	1	2
00350795	邢凯月	27	160	70	27.3438	3	0	G0P0	0	1	0	1	13	2	T1aN0M0	T1a	1	乳头状癌	2	2	2
00350806	李勤	30	163	52	19.5717	2	0	G2P2	2	2	2	2	14	2	T1bNxM0	T1b	1	乳头状癌	1	1	2
00350889	廖雯	25	163	79	29.7339	4	父亲患有脑瘤	G0P0	0	1	0	1	14	2	T1aN0M0	T1a	1	乳头状癌	2	2	2
00350884	王静	28	162	52	19.8141	2	0	G2P2	2	2	2	2	12	2	T1aN0M0	T1a	1	乳头状癌	2	2	2
00350894	杜杨平	25	153	50	21.3593	2	0	G1P1	1	2	1	2	13	2	T1aN1aM0	T1a	1	乳头状癌	1	1	2
00351027	李盟丹	25	160	60	23.4375	2	0	G0P0	0	1	0	1	13	2	T1bN0M0	T1b	1	乳头状癌	2	2	2
00351163	毛维芳	29	158	53	21.2306	2	0	G0P0	0	1	0	1	14	2	T1aN1aM0	T1a	1	乳头状癌	1	1	2
00351258	王爱文	25	161	58	22.3757	2	0	G1P1	1	2	1	2	13	2	T1bN1aM0	T1b	1	乳头状癌	1	1	2
00351369	王薇	26	160	57.5	22.4609	2	0	G1P1	1	2	1	2	14	2	T1aN1aM0	T1a	1	乳头状癌	1	1	2
00351467	李玲	30	158	52	20.83	2	0	G1P1	1	2	1	2	13	2	T3N1aM0	T3	1	乳头状癌	1	1	2
00351362	彭婷	20	159	49.5	19.5799	2	0	G0P0	0	1	0	1	15	3	T3N1bM0	T3	1	乳头状癌	1	1	1
00352124	徐瑾	24	165	58	21.3039	2	0	G1P1	1	2	1	2	13	2	T1aN1bM0	T1a	1	乳头状癌	1	1	1
00352165	胡丽	30	160	51.5	20.1172	2	0	G1P1	1	2	1	2	13	2	T1aN1bM0	T1a	1	乳头状癌	1	1	1
00352145	吕嘉琳	22	175	78	25.4694	3	0	G0P0	0	1	0	1	13	2	T3bN1aM0	T3b	1	乳头状癌	1	1	1
00352345	余河馨	24	152	41	17.7458	1	0	G2P2	2	2	2	2	14	2	T1aN1aM0	T1a	1	乳头状癌	1	1	2
00352282	宋丹	29	165	55	20.202	2	0	G1P1	1	2	1	2	12	2	T1aN1aM0	T1a	1	乳头状癌	1	1	2
00352507	雷蕾	27	155	74	30.8012	4	母亲患子宫肌瘤	G0P0	0	1	0	1	11	1	T1aN0M0	T1a	1	乳头状癌	2	2	2
00352524	蒲敏	24	160	55.5	21.6797	2	0	G1P1	1	2	1	2	13	2	T2N1bM0	T2	1	乳头状癌	1	1	1
00352754	赵璐	20	160	49	19.1406	2	0	G0P0	0	1	0	1	12	2	T1aN1aM0	T1a	1	乳头状癌	1	1	2
00352715	梁琴	28	149	40	18.0172	1	0	G2P1	2	2	1	2	13	2	T1bN1aM0	T1b	1	乳头状癌	1	1	2
00352831	邱正银	29	160	59	23.0469	2	0	G1P1	1	2	1	2	13	2	T1bN1aM0	T1b	1	乳头状癌	1	1	2
00352855	彭鼎天	27	163	57	21.4536	2	0	G0P0	0	1	0	1	13	2	T1aN1aM0	T1a	1	乳头状癌	1	1	2
00352988	陈瑶	27	158	59	23.634	2	0	G0P0	0	1	0	1	14	2	T1aN0M0	T1a	1	乳头状癌	2	2	2
00353346	邓玉巧	30	162	52	19.8141	2	0	G1P1	1	2	1	2	13	2	T1aN1aM0	T1a	1	乳头状癌	1	1	2
00353302	唐韦	22	163	62	23.3355	2	0	G0P0	0	1	0	1	12	2	T1aN1aM0	T1a	1	乳头状癌	1	1	2
00353659	李倩	26	159	51	20.1733	2	0	G1P1	1	2	1	2	14	2	T1aN1bM0	T1a	1	乳头状癌	1	1	2
00354076	周结	29	155	47	19.563	2	0	G2P2	2	2	2	2	14	2	T1aN1aM0	T1a	1	乳头状癌	1	1	2
00354255	廖静	26	155	44	18.3143	1	0	G1P1	1	2	1	2	16	3	T1aN1aM0	T1a	1	乳头状癌	1	1	2
00354157	刘耀阳	29	150	65	28.8889	4	0	G1P1	1	2	1	2	12	2	T1aN1bM0	T1a	1	乳头状癌	1	1	1
00354137	曹江	30	158	48.5	19.428	2	0	G2P1	2	2	1	2	13	2	T1bN0M0	T1b	1	乳头状癌	2	2	2
00354157	马敏烨	27	150	65	28.8889	4	0	G0P0	0	1	0	1	14	2	T1bN1bM0	T1b	1	乳头状癌	1	1	1
00354449	徐海洋	24	160	56	21.875	2	0	G0P0	0	1	0	1	15	3	T2N1bM0	T2	1	乳头状癌	1	1	2
00354600	王琴琴	29	164	46	17.1029	1	0	G1P1	1	2	1	2	14	2	T1bN0M0	T1b	1	乳头状癌	2	2	2
00355139	徐潇然	28	156	69	28.3531	4	0	G0P0	0	1	0	1	13	2	T1aN1aM0	T1a	1	乳头状癌	1	1	2
00355294	赵娟	26	153	40	17.0874	1	父亲患膀胱癌	G0P0	0	1	0	1	14	2	T1aN0M0	T1a	1	乳头状癌	2	2	2
00355249	胡欢	29	154	46.5	19.607	2	0	G1P1	1	2	1	2	13	2	T1aN1aM0	T1a	1	乳头状癌	1	1	2
00349088	刘路平	29	160	49.5	19.3359	2	0	G1P1	1	2	1	2	12	2	T1aN1aM0	T1a	1	乳头状癌	1	1	2
00355281	吕肖斌	30	168	59	20.9042	2	0	G1P1	1	2	1	2	12	2	T1bN1bM0	T1b	1	乳头状癌	1	1	1
00355396	唐怡	28	167	51	18.2868	1	0	G0P0	0	1	0	1	12	2	T1bN1aM0	T1b	1	乳头状癌	1	1	1
00355469	苏丹	24	160	51.5	20.1172	2	0	G0P0	0	1	0	1	12	2	T1bN1bM0	T1b	1	乳头状癌	1	1	1
00355742	刘磊	26	160	58	22.6562	2	0	G1P1	1	2	1	2	14	2	T1aN1aM0	T1a	1	乳头状癌	1	1	2
00355786	雷杰	27	156	42.5	17.4638	1	0	G0P0	0	1	0	1	14	2	T1bN0M0	T1b	1	乳头状癌	2	2	2
00355970	徐莎莎	20	166	51	18.5078	2	0	G0P0	0	1	0	1	14	2	T2N1aM0	T2	1	乳头状癌	1	1	2
00356365	谢丹	22	160	50	19.5312	2	0	G0P0	0	1	0	1	14	2	T1aN1aM0	T1a	1	乳头状癌	1	1	2
00356491	何燕	26	156	58	23.833	2	0	G0P0	0	1	0	1	14	2	T1aN0M0	T1a	1	乳头状癌	2	2	2
00356448	范智慧	19	168	45	15.9439	1	0	G0P0	0	1	0	1	14	2	T1bN1aM0	T1b	1	乳头状癌	1	1	2
00356723	田甜	29	162	50	19.052	2	0	G0P0	0	1	0	1	14	2	T1aN0M0	T1a	1	乳头状癌	2	2	2
00356693	王兴	28	163	55	20.7008	2	0	G1P1	1	2	1	2	15	3	T2N1bM0	T2	1	乳头状癌	1	1	1
00356772	王钰斐	24	163	51	19.1953	2	0	G0P0	0	1	0	1	12	2	T1aN0M0	T1a	1	乳头状癌	2	2	2
00356971	肖霜	28	145	42	19.9762	2	0	G1P0	1	2	0	1	15	3	T1aN0M0	T1a	1	乳头状癌	2	2	2
00357358	冯素芹	27	155	53	22.0604	2	0	G1P1	1	2	1	2	12	2	T1aN1bM0	T1a	1	乳头状癌	1	1	1
00357429	唐晓惠	28	153	55	23.4952	2	0	G1P1	1	2	1	2	15	3	T1bN1bM0	T1b	1	乳头状癌	1	1	1
00357536	张怡	24	165	50	18.3655	1	0	G1P1	1	2	1	2	12	2	T1aN0M0	T1a	1	乳头状癌	2	2	2
00357573	邹莉	24	155	55	22.8928	2	0	G1P1	1	2	1	2	12	2	T1aN0M0	T1a	1	乳头状癌	2	2	2
00357747	樊芳利	26	160	45	17.5781	1	0	G0P0	0	1	0	1	12	2	T1aN0M0	T1a	1	乳头状癌	2	2	2
00357940	卢艳	29	150	38	16.8889	1	0	G2P2	2	2	2	2	17	3	T1aN0M0	T1a	1	乳头状癌	2	2	2
00357938	黄媛	29	159	52	20.5688	2	0	G0P0	0	1	0	1	14	2	T1aN0M0	T1a	1	乳头状癌	2	2	2
00357984	汪美玲	30	163.5	57.5	21.5096	2	妹妹患有甲亢	G2P2	2	2	2	2	13	2	T1aN0M0	T1a	1	乳头状癌	2	2	2
00357791	方娟	27	155	42	17.4818	1	0	G0P0	0	1	0	1	13	2	T1aN0M0	T1a	1	乳头状癌	2	2	2
00357920	唐铭	26	158	46	18.4265	1	0	G0P0	0	1	0	1	12	2	T2N1aM0	T2	1	乳头状癌	1	1	2
00358106	魏丹	30	169	76	26.6097	3	0	G1P1	1	2	1	2	12	2	T3NxM0	T3	1	乳头状癌	3	1	2
00358168	糜梦雪	28	152	52	22.5069	2	0	G1P1	1	2	1	2	14	2	T1aN0M0	T1a	1	乳头状癌	2	2	2
00358182	邓莉丸	30	159	54	21.3599	2	0	G1P1	1	2	1	2	14	2	T1bN1aM0	T1b	1	乳头状癌	1	1	2
00358485	邓春燕	28	162	60	22.8624	2	0	G2P2	2	2	2	2	14	2	T1aN1aM0	T1a	1	乳头状癌	1	1	2
00357644	林小姝	28	160	55	21.4844	2	0	G0P0	0	1	0	1	14	2	T1aN1aM0	T1a	1	乳头状癌	1	1	2
00358478	常鑫琪	30	151	47	20.6131	2	0	G1P1	1	2	1	2	14	2	T1bN0M0	T1b	1	乳头状癌	2	2	2
00353620	范莉	28	153	45	19.2234	2	0	G0P0	0	1	0	1	13	2	T1aN0M0	T1a	1	乳头状癌	2	2	2
00358517	马亭	26	167	53	19.0039	2	0	G0P0	0	1	0	1	13	2	T1bN0M0	T1b	1	乳头状癌	2	2	2
00358556	蒋美玉	30	161	59	22.7615	2	0	G3P3	3	3	3	3	11	1	T1bN1bM0	T1b	1	乳头状癌	1	1	1
00358523	杨岚兰	26	161	52	20.061	2	爷爷患有糖尿病	G0P0	0	1	0	1	14	2	T2N0M0	T2	1	乳头状癌	2	2	2
00358554	刘婷婷	20	160	64	25	3	0	G0P0	0	1	0	1	14	2	T3N1bM0	T3	1	乳头状癌	1	1	1
00358718	苏琴	30	156	40	16.4366	1	0	G3P3	3	3	3	3	14	2	T1aN1aM0	T1a	1	乳头状癌	1	1	2
00359153	徐燕	28	165	50	18.3655	1	0	G0P0	0	1	0	1	14	2	T1aN0M0	T1a	1	乳头状癌	2	2	2
00359240	顾金凤	30	153	54	23.0681	2	0	G2P2	2	2	2	2	14	2	T1aN0M0	T1a	1	乳头状癌	2	2	2
00358410	胡琴	27	158	53.5	21.4309	2	0	G2P2	2	2	2	2	13	2	T2N1aM0	T2	1	乳头状癌	1	1	2
